# Supplementary material for: Aging with Disability Symptoms and Ability to Participate in, and Satisfaction with, Social Participation among Persons Aged 45–64
Source: MDPI journal article supplement (doi:10.3390/healthcare10050903), 2022-05-13
Supplement: s1 [file s1]

# **Aging with Disability Symptoms and Ability to Participate in, and Satisfaction with, Social Participation Among Persons Aged 45-64**

Michelle Putnam <sup>1,\*</sup>, Kerri Morgan<sup>2</sup>, Rachel Heeb <sup>2</sup>, Yan Yan <sup>3</sup>, Szu-Wei Chen <sup>2</sup> and Susan L. Stark <sup>2</sup>

Table S1: PROMIS Item Bank v2.0 - Satisfaction with Social Roles and Activities

**PROMIS Item Bank v2.0 - Satisfaction with Social Roles and Activities****Satisfaction with Social Roles and Activities – Calibrated Items**

Please respond to each item by marking one box per row.

|                   |                                                                                                           | Not at all                    | A little bit                  | Somewhat                      | Quite a bit                   | Very much                     |
|-------------------|-----------------------------------------------------------------------------------------------------------|-------------------------------|-------------------------------|-------------------------------|-------------------------------|-------------------------------|
| SRPSAT17_<br>CaPS | I am satisfied with the extent of my social activities outside my home .....                              | <input type="checkbox"/><br>1 | <input type="checkbox"/><br>2 | <input type="checkbox"/><br>3 | <input type="checkbox"/><br>4 | <input type="checkbox"/><br>5 |
| RP14_CaPS         | I am satisfied with my current level of family activities.....                                            | <input type="checkbox"/><br>1 | <input type="checkbox"/><br>2 | <input type="checkbox"/><br>3 | <input type="checkbox"/><br>4 | <input type="checkbox"/><br>5 |
| RP7_CaPS          | I am satisfied with my ability to maintain friendships.....                                               | <input type="checkbox"/><br>1 | <input type="checkbox"/><br>2 | <input type="checkbox"/><br>3 | <input type="checkbox"/><br>4 | <input type="checkbox"/><br>5 |
| SRPSAT03_<br>CaPS | I am satisfied with how often I go out for entertainment .....                                            | <input type="checkbox"/><br>1 | <input type="checkbox"/><br>2 | <input type="checkbox"/><br>3 | <input type="checkbox"/><br>4 | <input type="checkbox"/><br>5 |
| SRPSAT04_<br>CaPS | I am satisfied with my ability to socialize with friends .....                                            | <input type="checkbox"/><br>1 | <input type="checkbox"/><br>2 | <input type="checkbox"/><br>3 | <input type="checkbox"/><br>4 | <input type="checkbox"/><br>5 |
| SRPSAT05r1        | I am satisfied with the amount of time I spend doing leisure activities .....                             | <input type="checkbox"/><br>1 | <input type="checkbox"/><br>2 | <input type="checkbox"/><br>3 | <input type="checkbox"/><br>4 | <input type="checkbox"/><br>5 |
| SRPSAT05_<br>CaPS | I am satisfied with the amount of time I spend doing leisure activities with others                       | <input type="checkbox"/><br>1 | <input type="checkbox"/><br>2 | <input type="checkbox"/><br>3 | <input type="checkbox"/><br>4 | <input type="checkbox"/><br>5 |
| SRPSAT06r1        | I am satisfied with my ability to do things for my family .....                                           | <input type="checkbox"/><br>1 | <input type="checkbox"/><br>2 | <input type="checkbox"/><br>3 | <input type="checkbox"/><br>4 | <input type="checkbox"/><br>5 |
| SRPSAT07r1        | I am satisfied with how much work I can do (include work at home) .....                                   | <input type="checkbox"/><br>1 | <input type="checkbox"/><br>2 | <input type="checkbox"/><br>3 | <input type="checkbox"/><br>4 | <input type="checkbox"/><br>5 |
| SRPSAT08r1        | I feel good about my ability to do things for my family .....                                             | <input type="checkbox"/><br>1 | <input type="checkbox"/><br>2 | <input type="checkbox"/><br>3 | <input type="checkbox"/><br>4 | <input type="checkbox"/><br>5 |
| SRPSAT09r1        | I am satisfied with my ability to do the work that is really important to me (include work at home) ..... | <input type="checkbox"/><br>1 | <input type="checkbox"/><br>2 | <input type="checkbox"/><br>3 | <input type="checkbox"/><br>4 | <input type="checkbox"/><br>5 |
| SRPSAT10r1        | I am satisfied with my current level of social activity .....                                             | <input type="checkbox"/><br>1 | <input type="checkbox"/><br>2 | <input type="checkbox"/><br>3 | <input type="checkbox"/><br>4 | <input type="checkbox"/><br>5 |

**PROMIS Item Bank v2.0 - Satisfaction with Social Roles and Activities**

|                   |                                                                                                            | <b>Not at all</b>             | <b>A little bit</b>           | <b>Somewhat</b>               | <b>Quite a bit</b>            | <b>Very much</b>              |
|-------------------|------------------------------------------------------------------------------------------------------------|-------------------------------|-------------------------------|-------------------------------|-------------------------------|-------------------------------|
| SRPSAT15_<br>CaPS | I am satisfied with my ability to participate in family activities.....                                    | <input type="checkbox"/><br>1 | <input type="checkbox"/><br>2 | <input type="checkbox"/><br>3 | <input type="checkbox"/><br>4 | <input type="checkbox"/><br>5 |
| SRPSAT19r1        | I am satisfied with my ability to do all of the community activities that are really important to me ..... | <input type="checkbox"/><br>1 | <input type="checkbox"/><br>2 | <input type="checkbox"/><br>3 | <input type="checkbox"/><br>4 | <input type="checkbox"/><br>5 |
| SRPSAT20r1        | I am satisfied with my ability to do things for my friends.....                                            | <input type="checkbox"/><br>1 | <input type="checkbox"/><br>2 | <input type="checkbox"/><br>3 | <input type="checkbox"/><br>4 | <input type="checkbox"/><br>5 |
| SRPSAT21r1        | I am satisfied with the amount of time I spend doing work (include work at home) .....                     | <input type="checkbox"/><br>1 | <input type="checkbox"/><br>2 | <input type="checkbox"/><br>3 | <input type="checkbox"/><br>4 | <input type="checkbox"/><br>5 |
| SRPSAT22r1        | I am happy with how much I do for my family .....                                                          | <input type="checkbox"/><br>1 | <input type="checkbox"/><br>2 | <input type="checkbox"/><br>3 | <input type="checkbox"/><br>4 | <input type="checkbox"/><br>5 |
| SRPSAT23r1        | I am satisfied with my ability to do leisure activities .....                                              | <input type="checkbox"/><br>1 | <input type="checkbox"/><br>2 | <input type="checkbox"/><br>3 | <input type="checkbox"/><br>4 | <input type="checkbox"/><br>5 |
| SRPSAT23_<br>CaPS | I am satisfied with my ability to do leisure activities with others .....                                  | <input type="checkbox"/><br>1 | <input type="checkbox"/><br>2 | <input type="checkbox"/><br>3 | <input type="checkbox"/><br>4 | <input type="checkbox"/><br>5 |
| SRPSAT24r1        | I am satisfied with my ability to work (include work at home) .....                                        | <input type="checkbox"/><br>1 | <input type="checkbox"/><br>2 | <input type="checkbox"/><br>3 | <input type="checkbox"/><br>4 | <input type="checkbox"/><br>5 |
| SRPSAT25r1        | I am satisfied with my current level of activities with my friends.....                                    | <input type="checkbox"/><br>1 | <input type="checkbox"/><br>2 | <input type="checkbox"/><br>3 | <input type="checkbox"/><br>4 | <input type="checkbox"/><br>5 |
| SRPSAT29_<br>CaPS | I am satisfied with my ability to engage in activities with friends.....                                   | <input type="checkbox"/><br>1 | <input type="checkbox"/><br>2 | <input type="checkbox"/><br>3 | <input type="checkbox"/><br>4 | <input type="checkbox"/><br>5 |
| SRPSAT33r1        | I am satisfied with my ability to do things for fun outside my home .....                                  | <input type="checkbox"/><br>1 | <input type="checkbox"/><br>2 | <input type="checkbox"/><br>3 | <input type="checkbox"/><br>4 | <input type="checkbox"/><br>5 |
| SRPSAT33_<br>CaPS | I am satisfied with my ability to do things for fun with others.....                                       | <input type="checkbox"/><br>1 | <input type="checkbox"/><br>2 | <input type="checkbox"/><br>3 | <input type="checkbox"/><br>4 | <input type="checkbox"/><br>5 |
| SRPSAT34r1        | I feel good about my ability to do things for my friends.....                                              | <input type="checkbox"/><br>1 | <input type="checkbox"/><br>2 | <input type="checkbox"/><br>3 | <input type="checkbox"/><br>4 | <input type="checkbox"/><br>5 |

**PROMIS Item Bank v2.0 - Satisfaction with Social Roles and Activities**

|               |                                                                                                            | <b>Not at all</b>             | <b>A little bit</b>           | <b>Somewhat</b>               | <b>Quite a bit</b>            | <b>Very much</b>              |
|---------------|------------------------------------------------------------------------------------------------------------|-------------------------------|-------------------------------|-------------------------------|-------------------------------|-------------------------------|
| SRPSAT35r1    | The quality of my work is as good as I want it to be (include work at home) .....                          | <input type="checkbox"/><br>1 | <input type="checkbox"/><br>2 | <input type="checkbox"/><br>3 | <input type="checkbox"/><br>4 | <input type="checkbox"/><br>5 |
| SRPSAT36r1    | I am happy with how much I do for my friends .....                                                         | <input type="checkbox"/><br>1 | <input type="checkbox"/><br>2 | <input type="checkbox"/><br>3 | <input type="checkbox"/><br>4 | <input type="checkbox"/><br>5 |
| SRPSAT37r1    | I am satisfied with the amount of time I spend visiting friends .....                                      | <input type="checkbox"/><br>1 | <input type="checkbox"/><br>2 | <input type="checkbox"/><br>3 | <input type="checkbox"/><br>4 | <input type="checkbox"/><br>5 |
| SRPSAT38r1    | I am satisfied with the amount of time I spend performing my daily routines .....                          | <input type="checkbox"/><br>1 | <input type="checkbox"/><br>2 | <input type="checkbox"/><br>3 | <input type="checkbox"/><br>4 | <input type="checkbox"/><br>5 |
| SRPSAT38_CaPS | I am satisfied with the amount of time I spend doing things for my family .....                            | <input type="checkbox"/><br>1 | <input type="checkbox"/><br>2 | <input type="checkbox"/><br>3 | <input type="checkbox"/><br>4 | <input type="checkbox"/><br>5 |
| SRPSAT39r1    | I am satisfied with my ability to do household chores/tasks .....                                          | <input type="checkbox"/><br>1 | <input type="checkbox"/><br>2 | <input type="checkbox"/><br>3 | <input type="checkbox"/><br>4 | <input type="checkbox"/><br>5 |
| SRPSAT41_CaPS | I am satisfied with the extent of my social activities with groups of people....                           | <input type="checkbox"/><br>1 | <input type="checkbox"/><br>2 | <input type="checkbox"/><br>3 | <input type="checkbox"/><br>4 | <input type="checkbox"/><br>5 |
| SRPSAT43_CaPS | I am satisfied with my ability to keep in touch with others.....                                           | <input type="checkbox"/><br>1 | <input type="checkbox"/><br>2 | <input type="checkbox"/><br>3 | <input type="checkbox"/><br>4 | <input type="checkbox"/><br>5 |
| SRPSAT45_CaPS | I am satisfied with my ability to meet the needs of my family .....                                        | <input type="checkbox"/><br>1 | <input type="checkbox"/><br>2 | <input type="checkbox"/><br>3 | <input type="checkbox"/><br>4 | <input type="checkbox"/><br>5 |
| SRPSAT46_CaPS | I am satisfied with my ability to meet the needs of my friends.....                                        | <input type="checkbox"/><br>1 | <input type="checkbox"/><br>2 | <input type="checkbox"/><br>3 | <input type="checkbox"/><br>4 | <input type="checkbox"/><br>5 |
| SRPSAT47r1    | I am satisfied with my ability to do regular personal and household responsibilities .....                 | <input type="checkbox"/><br>1 | <input type="checkbox"/><br>2 | <input type="checkbox"/><br>3 | <input type="checkbox"/><br>4 | <input type="checkbox"/><br>5 |
| SRPSAT47_CaPS | I am satisfied with my ability to do regular personal responsibilities .....                               | <input type="checkbox"/><br>1 | <input type="checkbox"/><br>2 | <input type="checkbox"/><br>3 | <input type="checkbox"/><br>4 | <input type="checkbox"/><br>5 |
| SRPSAT48r1    | I am satisfied with my ability to do things for fun at home (like reading, listening to music, etc.) ..... | <input type="checkbox"/><br>1 | <input type="checkbox"/><br>2 | <input type="checkbox"/><br>3 | <input type="checkbox"/><br>4 | <input type="checkbox"/><br>5 |

**PROMIS Item Bank v2.0 - Satisfaction with Social Roles and Activities**

|                   |                                                                                                          | <b>Not at all</b>             | <b>A little bit</b>           | <b>Somewhat</b>               | <b>Quite a bit</b>            | <b>Very much</b>              |
|-------------------|----------------------------------------------------------------------------------------------------------|-------------------------------|-------------------------------|-------------------------------|-------------------------------|-------------------------------|
| SRPSAT49r1        | I am satisfied with my ability to perform my daily routines .....                                        | <input type="checkbox"/><br>1 | <input type="checkbox"/><br>2 | <input type="checkbox"/><br>3 | <input type="checkbox"/><br>4 | <input type="checkbox"/><br>5 |
| SRPSAT50r1        | I am satisfied with my ability to meet the needs of those who depend on me .....                         | <input type="checkbox"/><br>1 | <input type="checkbox"/><br>2 | <input type="checkbox"/><br>3 | <input type="checkbox"/><br>4 | <input type="checkbox"/><br>5 |
| SRPSAT51r1        | I am satisfied with my ability to run errands .....                                                      | <input type="checkbox"/><br>1 | <input type="checkbox"/><br>2 | <input type="checkbox"/><br>3 | <input type="checkbox"/><br>4 | <input type="checkbox"/><br>5 |
| SRPSAT51_<br>CaPS | I am satisfied with my ability to run errands for others .....                                           | <input type="checkbox"/><br>1 | <input type="checkbox"/><br>2 | <input type="checkbox"/><br>3 | <input type="checkbox"/><br>4 | <input type="checkbox"/><br>5 |
| SRPSAT52r1        | I am satisfied with my ability to do all of the leisure activities that are really important to me ..... | <input type="checkbox"/><br>1 | <input type="checkbox"/><br>2 | <input type="checkbox"/><br>3 | <input type="checkbox"/><br>4 | <input type="checkbox"/><br>5 |
| SRPSAT52_<br>CaPS | I am satisfied with my ability to do all of the group activities that are really important to me .....   | <input type="checkbox"/><br>1 | <input type="checkbox"/><br>2 | <input type="checkbox"/><br>3 | <input type="checkbox"/><br>4 | <input type="checkbox"/><br>5 |

Table S2: PROMIS Item Bank v2.0 - Ability to Participate in Social Roles and Activities

**PROMIS Item Bank v2.0 - Ability to Participate in Social Roles and Activities****Ability to Participate in Social Roles and Activities – Calibrated Items**

Please respond to each item by marking one box per row.

|               |                                                                                    | Never                         | Rarely                        | Sometimes                     | Usually                       | Always                        |
|---------------|------------------------------------------------------------------------------------|-------------------------------|-------------------------------|-------------------------------|-------------------------------|-------------------------------|
| RP1           | I have trouble doing my regular daily work around the house .....                  | <input type="checkbox"/><br>5 | <input type="checkbox"/><br>4 | <input type="checkbox"/><br>3 | <input type="checkbox"/><br>2 | <input type="checkbox"/><br>1 |
| RP6           | I have trouble meeting the needs of my friends .....                               | <input type="checkbox"/><br>5 | <input type="checkbox"/><br>4 | <input type="checkbox"/><br>3 | <input type="checkbox"/><br>2 | <input type="checkbox"/><br>1 |
| SRPPER_CaPS1  | I have to limit social activities at home ..                                       | <input type="checkbox"/><br>5 | <input type="checkbox"/><br>4 | <input type="checkbox"/><br>3 | <input type="checkbox"/><br>2 | <input type="checkbox"/><br>1 |
| SRPPER01_r1   | I have trouble meeting the needs of my family .....                                | <input type="checkbox"/><br>5 | <input type="checkbox"/><br>4 | <input type="checkbox"/><br>3 | <input type="checkbox"/><br>2 | <input type="checkbox"/><br>1 |
| SRPPER02_r1   | I am limited in doing my work (include work at home) .....                         | <input type="checkbox"/><br>5 | <input type="checkbox"/><br>4 | <input type="checkbox"/><br>3 | <input type="checkbox"/><br>2 | <input type="checkbox"/><br>1 |
| SRPPER03_r1   | I have to limit social activities outside my home .....                            | <input type="checkbox"/><br>5 | <input type="checkbox"/><br>4 | <input type="checkbox"/><br>3 | <input type="checkbox"/><br>2 | <input type="checkbox"/><br>1 |
| SRPPER04_CaPS | I have trouble participating in recreational activities with others .....          | <input type="checkbox"/><br>5 | <input type="checkbox"/><br>4 | <input type="checkbox"/><br>3 | <input type="checkbox"/><br>2 | <input type="checkbox"/><br>1 |
| SRPPER05_CaPS | I have trouble doing everything for my family that I feel I should do.....         | <input type="checkbox"/><br>5 | <input type="checkbox"/><br>4 | <input type="checkbox"/><br>3 | <input type="checkbox"/><br>2 | <input type="checkbox"/><br>1 |
| SRPPER06_CaPS | I have trouble accomplishing my usual work (include work at home).....             | <input type="checkbox"/><br>5 | <input type="checkbox"/><br>4 | <input type="checkbox"/><br>3 | <input type="checkbox"/><br>2 | <input type="checkbox"/><br>1 |
| SRPPER07_CaPS | I have trouble doing all of the family activities that I feel I should do.....     | <input type="checkbox"/><br>5 | <input type="checkbox"/><br>4 | <input type="checkbox"/><br>3 | <input type="checkbox"/><br>2 | <input type="checkbox"/><br>1 |
| SRPPER08_CaPS | I have trouble doing all of the family activities that are really important to me. | <input type="checkbox"/><br>5 | <input type="checkbox"/><br>4 | <input type="checkbox"/><br>3 | <input type="checkbox"/><br>2 | <input type="checkbox"/><br>1 |
| SRPPER09_CaPS | I have trouble doing everything for work that I want to do (include work at home). | <input type="checkbox"/><br>5 | <input type="checkbox"/><br>4 | <input type="checkbox"/><br>3 | <input type="checkbox"/><br>2 | <input type="checkbox"/><br>1 |

**PROMIS Item Bank v2.0 - Ability to Participate in Social Roles and Activities**

|                   |                                                                                                  | <b>Never</b>                  | <b>Rarely</b>                 | <b>Sometimes</b>              | <b>Usually</b>                | <b>Always</b>                 |
|-------------------|--------------------------------------------------------------------------------------------------|-------------------------------|-------------------------------|-------------------------------|-------------------------------|-------------------------------|
| SRPPER11<br>_CaPS | I have trouble doing all of my regular leisure activities with others .....                      | <input type="checkbox"/><br>5 | <input type="checkbox"/><br>4 | <input type="checkbox"/><br>3 | <input type="checkbox"/><br>2 | <input type="checkbox"/><br>1 |
| SRPPER13<br>_CaPS | I have to limit social activities with groups of people.....                                     | <input type="checkbox"/><br>5 | <input type="checkbox"/><br>4 | <input type="checkbox"/><br>3 | <input type="checkbox"/><br>2 | <input type="checkbox"/><br>1 |
| SRPPER14<br>r1    | I have to limit my regular family activities .....                                               | <input type="checkbox"/><br>5 | <input type="checkbox"/><br>4 | <input type="checkbox"/><br>3 | <input type="checkbox"/><br>2 | <input type="checkbox"/><br>1 |
| SRPPER15<br>_CaPS | I have to limit the things I do for fun with others.....                                         | <input type="checkbox"/><br>5 | <input type="checkbox"/><br>4 | <input type="checkbox"/><br>3 | <input type="checkbox"/><br>2 | <input type="checkbox"/><br>1 |
| SRPPER16<br>r1    | I have to do my work for shorter periods of time than usual (include work at home) .....         | <input type="checkbox"/><br>5 | <input type="checkbox"/><br>4 | <input type="checkbox"/><br>3 | <input type="checkbox"/><br>2 | <input type="checkbox"/><br>1 |
| SRPPER17<br>r1    | I feel limited in the amount of time I have for my family.....                                   | <input type="checkbox"/><br>5 | <input type="checkbox"/><br>4 | <input type="checkbox"/><br>3 | <input type="checkbox"/><br>2 | <input type="checkbox"/><br>1 |
| SRPPER18<br>_CaPS | I have trouble doing all of the family activities that I want to do.....                         | <input type="checkbox"/><br>5 | <input type="checkbox"/><br>4 | <input type="checkbox"/><br>3 | <input type="checkbox"/><br>2 | <input type="checkbox"/><br>1 |
| SRPPER20<br>_CaPS | I have trouble doing all of the activities with friends that are really important to me.....     | <input type="checkbox"/><br>5 | <input type="checkbox"/><br>4 | <input type="checkbox"/><br>3 | <input type="checkbox"/><br>2 | <input type="checkbox"/><br>1 |
| SRPPER21<br>_CaPS | I have trouble doing all the leisure activities with others that I want to do .....              | <input type="checkbox"/><br>5 | <input type="checkbox"/><br>4 | <input type="checkbox"/><br>3 | <input type="checkbox"/><br>2 | <input type="checkbox"/><br>1 |
| SRPPER22<br>_CaPS | I have trouble keeping up with my family responsibilities.....                                   | <input type="checkbox"/><br>5 | <input type="checkbox"/><br>4 | <input type="checkbox"/><br>3 | <input type="checkbox"/><br>2 | <input type="checkbox"/><br>1 |
| SRPPER23<br>_CaPS | I have trouble doing all of my usual work (include work at home) .....                           | <input type="checkbox"/><br>5 | <input type="checkbox"/><br>4 | <input type="checkbox"/><br>3 | <input type="checkbox"/><br>2 | <input type="checkbox"/><br>1 |
| SRPPER26<br>_CaPS | I have trouble doing all of the work that is really important to me (include work at home) ..... | <input type="checkbox"/><br>5 | <input type="checkbox"/><br>4 | <input type="checkbox"/><br>3 | <input type="checkbox"/><br>2 | <input type="checkbox"/><br>1 |
| SRPPER28<br>r1    | I have to limit my regular activities with friends .....                                         | <input type="checkbox"/><br>5 | <input type="checkbox"/><br>4 | <input type="checkbox"/><br>3 | <input type="checkbox"/><br>2 | <input type="checkbox"/><br>1 |

**PROMIS Item Bank v2.0 - Ability to Participate in Social Roles and Activities**

|                   |                                                                                        | <b>Never</b>                  | <b>Rarely</b>                 | <b>Sometimes</b>              | <b>Usually</b>                | <b>Always</b>                 |
|-------------------|----------------------------------------------------------------------------------------|-------------------------------|-------------------------------|-------------------------------|-------------------------------|-------------------------------|
| SRPPER31<br>_CaPS | I have trouble taking care of my regular personal responsibilities.....                | <input type="checkbox"/><br>5 | <input type="checkbox"/><br>4 | <input type="checkbox"/><br>3 | <input type="checkbox"/><br>2 | <input type="checkbox"/><br>1 |
| SRPPER35<br>_CaPS | I have trouble doing everything for my friends that I want to do .....                 | <input type="checkbox"/><br>5 | <input type="checkbox"/><br>4 | <input type="checkbox"/><br>3 | <input type="checkbox"/><br>2 | <input type="checkbox"/><br>1 |
| SRPPER36<br>_CaPS | I have trouble doing all of the activities with friends that I feel I should do .....  | <input type="checkbox"/><br>5 | <input type="checkbox"/><br>4 | <input type="checkbox"/><br>3 | <input type="checkbox"/><br>2 | <input type="checkbox"/><br>1 |
| SRPPER37<br>_CaPS | I have trouble doing all of the work that I feel I should do (include work at home)... | <input type="checkbox"/><br>5 | <input type="checkbox"/><br>4 | <input type="checkbox"/><br>3 | <input type="checkbox"/><br>2 | <input type="checkbox"/><br>1 |
| SRPPER42<br>r1    | I feel limited in my ability to visit friends .....                                    | <input type="checkbox"/><br>5 | <input type="checkbox"/><br>4 | <input type="checkbox"/><br>3 | <input type="checkbox"/><br>2 | <input type="checkbox"/><br>1 |
| SRPPER43<br>r1    | I have trouble keeping in touch with others.....                                       | <input type="checkbox"/><br>5 | <input type="checkbox"/><br>4 | <input type="checkbox"/><br>3 | <input type="checkbox"/><br>2 | <input type="checkbox"/><br>1 |
| SRPPER46<br>_CaPS | I have trouble doing all of the activities with friends that I want to do .....        | <input type="checkbox"/><br>5 | <input type="checkbox"/><br>4 | <input type="checkbox"/><br>3 | <input type="checkbox"/><br>2 | <input type="checkbox"/><br>1 |
| SRPPER47<br>_CaPS | I have trouble keeping up with my work responsibilities (include work at home)....     | <input type="checkbox"/><br>5 | <input type="checkbox"/><br>4 | <input type="checkbox"/><br>3 | <input type="checkbox"/><br>2 | <input type="checkbox"/><br>1 |
| SRPPER54<br>_CaPS | I have trouble doing everything for my friends that I feel I should do .....           | <input type="checkbox"/><br>5 | <input type="checkbox"/><br>4 | <input type="checkbox"/><br>3 | <input type="checkbox"/><br>2 | <input type="checkbox"/><br>1 |
| SRPPER55<br>r1    | I feel limited in the amount of time I have to visit friends.....                      | <input type="checkbox"/><br>5 | <input type="checkbox"/><br>4 | <input type="checkbox"/><br>3 | <input type="checkbox"/><br>2 | <input type="checkbox"/><br>1 |



**Emotional Distress - Depression – Calibrated Items****Please respond to each item by marking one box per row.****In the past 7 days...**

|         |                                                    | Never                         | Rarely                        | Sometimes                     | Often                         | Always                        |
|---------|----------------------------------------------------|-------------------------------|-------------------------------|-------------------------------|-------------------------------|-------------------------------|
| EDDEP04 | I felt worthless.....                              | <input type="checkbox"/><br>1 | <input type="checkbox"/><br>2 | <input type="checkbox"/><br>3 | <input type="checkbox"/><br>4 | <input type="checkbox"/><br>5 |
| EDDEP05 | I felt that I had nothing to look forward to ..... | <input type="checkbox"/><br>1 | <input type="checkbox"/><br>2 | <input type="checkbox"/><br>3 | <input type="checkbox"/><br>4 | <input type="checkbox"/><br>5 |
| EDDEP06 | I felt helpless.....                               | <input type="checkbox"/><br>1 | <input type="checkbox"/><br>2 | <input type="checkbox"/><br>3 | <input type="checkbox"/><br>4 | <input type="checkbox"/><br>5 |
| EDDEP07 | I withdrew from other people.....                  | <input type="checkbox"/><br>1 | <input type="checkbox"/><br>2 | <input type="checkbox"/><br>3 | <input type="checkbox"/><br>4 | <input type="checkbox"/><br>5 |
| EDDEP09 | I felt that nothing could cheer me up...           | <input type="checkbox"/><br>1 | <input type="checkbox"/><br>2 | <input type="checkbox"/><br>3 | <input type="checkbox"/><br>4 | <input type="checkbox"/><br>5 |
| EDDEP14 | I felt that I was not as good as other people..... | <input type="checkbox"/><br>1 | <input type="checkbox"/><br>2 | <input type="checkbox"/><br>3 | <input type="checkbox"/><br>4 | <input type="checkbox"/><br>5 |
| EDDEP17 | I felt sad.....                                    | <input type="checkbox"/><br>1 | <input type="checkbox"/><br>2 | <input type="checkbox"/><br>3 | <input type="checkbox"/><br>4 | <input type="checkbox"/><br>5 |
| EDDEP19 | I felt that I wanted to give up on everything..... | <input type="checkbox"/><br>1 | <input type="checkbox"/><br>2 | <input type="checkbox"/><br>3 | <input type="checkbox"/><br>4 | <input type="checkbox"/><br>5 |
| EDDEP21 | I felt that I was to blame for things.....         | <input type="checkbox"/><br>1 | <input type="checkbox"/><br>2 | <input type="checkbox"/><br>3 | <input type="checkbox"/><br>4 | <input type="checkbox"/><br>5 |

**In the past 7 days...**

|         |                                                       | Never                         | Rarely                        | Sometimes                     | Often                         | Always                        |
|---------|-------------------------------------------------------|-------------------------------|-------------------------------|-------------------------------|-------------------------------|-------------------------------|
| EDDEP22 | I felt like a failure.....                            | <input type="checkbox"/><br>1 | <input type="checkbox"/><br>2 | <input type="checkbox"/><br>3 | <input type="checkbox"/><br>4 | <input type="checkbox"/><br>5 |
| EDDEP23 | I had trouble feeling close to people.....            | <input type="checkbox"/><br>1 | <input type="checkbox"/><br>2 | <input type="checkbox"/><br>3 | <input type="checkbox"/><br>4 | <input type="checkbox"/><br>5 |
| EDDEP26 | I felt disappointed in myself.....                    | <input type="checkbox"/><br>1 | <input type="checkbox"/><br>2 | <input type="checkbox"/><br>3 | <input type="checkbox"/><br>4 | <input type="checkbox"/><br>5 |
| EDDEP27 | I felt that I was not needed.....                     | <input type="checkbox"/><br>1 | <input type="checkbox"/><br>2 | <input type="checkbox"/><br>3 | <input type="checkbox"/><br>4 | <input type="checkbox"/><br>5 |
| EDDEP28 | I felt lonely.....                                    | <input type="checkbox"/><br>1 | <input type="checkbox"/><br>2 | <input type="checkbox"/><br>3 | <input type="checkbox"/><br>4 | <input type="checkbox"/><br>5 |
| EDDEP29 | I felt depressed.....                                 | <input type="checkbox"/><br>1 | <input type="checkbox"/><br>2 | <input type="checkbox"/><br>3 | <input type="checkbox"/><br>4 | <input type="checkbox"/><br>5 |
| EDDEP30 | I had trouble making decisions.....                   | <input type="checkbox"/><br>1 | <input type="checkbox"/><br>2 | <input type="checkbox"/><br>3 | <input type="checkbox"/><br>4 | <input type="checkbox"/><br>5 |
| EDDEP31 | I felt discouraged about the future.....              | <input type="checkbox"/><br>1 | <input type="checkbox"/><br>2 | <input type="checkbox"/><br>3 | <input type="checkbox"/><br>4 | <input type="checkbox"/><br>5 |
| EDDEP35 | I found that things in my life were overwhelming..... | <input type="checkbox"/><br>1 | <input type="checkbox"/><br>2 | <input type="checkbox"/><br>3 | <input type="checkbox"/><br>4 | <input type="checkbox"/><br>5 |
| EDDEP36 | I felt unhappy.....                                   | <input type="checkbox"/><br>1 | <input type="checkbox"/><br>2 | <input type="checkbox"/><br>3 | <input type="checkbox"/><br>4 | <input type="checkbox"/><br>5 |
| EDDEP39 | I felt I had no reason for living.....                | <input type="checkbox"/><br>1 | <input type="checkbox"/><br>2 | <input type="checkbox"/><br>3 | <input type="checkbox"/><br>4 | <input type="checkbox"/><br>5 |

**In the past 7 days...**

|         |                                          | Never                         | Rarely                        | Sometimes                     | Often                         | Always                        |
|---------|------------------------------------------|-------------------------------|-------------------------------|-------------------------------|-------------------------------|-------------------------------|
| EDDEP41 | I felt hopeless.....                     | <input type="checkbox"/><br>1 | <input type="checkbox"/><br>2 | <input type="checkbox"/><br>3 | <input type="checkbox"/><br>4 | <input type="checkbox"/><br>5 |
| EDDEP42 | I felt ignored by people.....            | <input type="checkbox"/><br>1 | <input type="checkbox"/><br>2 | <input type="checkbox"/><br>3 | <input type="checkbox"/><br>4 | <input type="checkbox"/><br>5 |
| EDDEP44 | I felt upset for no reason.....          | <input type="checkbox"/><br>1 | <input type="checkbox"/><br>2 | <input type="checkbox"/><br>3 | <input type="checkbox"/><br>4 | <input type="checkbox"/><br>5 |
| EDDEP45 | I felt that nothing was interesting..... | <input type="checkbox"/><br>1 | <input type="checkbox"/><br>2 | <input type="checkbox"/><br>3 | <input type="checkbox"/><br>4 | <input type="checkbox"/><br>5 |
| EDDEP46 | I felt pessimistic.....                  | <input type="checkbox"/><br>1 | <input type="checkbox"/><br>2 | <input type="checkbox"/><br>3 | <input type="checkbox"/><br>4 | <input type="checkbox"/><br>5 |
| EDDEP48 | I felt that my life was empty.....       | <input type="checkbox"/><br>1 | <input type="checkbox"/><br>2 | <input type="checkbox"/><br>3 | <input type="checkbox"/><br>4 | <input type="checkbox"/><br>5 |
| EDDEP50 | I felt guilty.....                       | <input type="checkbox"/><br>1 | <input type="checkbox"/><br>2 | <input type="checkbox"/><br>3 | <input type="checkbox"/><br>4 | <input type="checkbox"/><br>5 |
| EDDEP54 | I felt emotionally exhausted.....        | <input type="checkbox"/><br>1 | <input type="checkbox"/><br>2 | <input type="checkbox"/><br>3 | <input type="checkbox"/><br>4 | <input type="checkbox"/><br>5 |

Table S4: PROMIS Bank v1.1 – Pain Interference

PROMIS Bank v1.1 – Pain Interference

**Pain Interference****Please respond to each item by marking one box per row.****In the past 7 days...**

|          |                                                                                          | Not at all                    | A little bit                  | Somewhat                      | Quite a bit                   | Very much                     |
|----------|------------------------------------------------------------------------------------------|-------------------------------|-------------------------------|-------------------------------|-------------------------------|-------------------------------|
| PAININ1  | How difficult was it for you to take in new information because of pain? .....           | <input type="checkbox"/><br>1 | <input type="checkbox"/><br>2 | <input type="checkbox"/><br>3 | <input type="checkbox"/><br>4 | <input type="checkbox"/><br>5 |
| PAININ3  | How much did pain interfere with your enjoyment of life? .....                           | <input type="checkbox"/><br>1 | <input type="checkbox"/><br>2 | <input type="checkbox"/><br>3 | <input type="checkbox"/><br>4 | <input type="checkbox"/><br>5 |
| PAININ5  | How much did pain interfere with your ability to participate in leisure activities?..... | <input type="checkbox"/><br>1 | <input type="checkbox"/><br>2 | <input type="checkbox"/><br>3 | <input type="checkbox"/><br>4 | <input type="checkbox"/><br>5 |
| PAININ6  | How much did pain interfere with your close personal relationships?.....                 | <input type="checkbox"/><br>1 | <input type="checkbox"/><br>2 | <input type="checkbox"/><br>3 | <input type="checkbox"/><br>4 | <input type="checkbox"/><br>5 |
| PAININ8  | How much did pain interfere with your ability to concentrate?.....                       | <input type="checkbox"/><br>1 | <input type="checkbox"/><br>2 | <input type="checkbox"/><br>3 | <input type="checkbox"/><br>4 | <input type="checkbox"/><br>5 |
| PAININ9  | How much did pain interfere with your day to day activities?.....                        | <input type="checkbox"/><br>1 | <input type="checkbox"/><br>2 | <input type="checkbox"/><br>3 | <input type="checkbox"/><br>4 | <input type="checkbox"/><br>5 |
| PAININ10 | How much did pain interfere with your enjoyment of recreational activities?.....         | <input type="checkbox"/><br>1 | <input type="checkbox"/><br>2 | <input type="checkbox"/><br>3 | <input type="checkbox"/><br>4 | <input type="checkbox"/><br>5 |

**In the past 7 days...**

|          |                                                                                     | Not at all                    | A little bit                  | Somewhat                      | Quite a bit                   | Very much                     |
|----------|-------------------------------------------------------------------------------------|-------------------------------|-------------------------------|-------------------------------|-------------------------------|-------------------------------|
| PAININ11 | How often did you feel emotionally tense because of your pain?.....                 | <input type="checkbox"/><br>1 | <input type="checkbox"/><br>2 | <input type="checkbox"/><br>3 | <input type="checkbox"/><br>4 | <input type="checkbox"/><br>5 |
| PAININ12 | How much did pain interfere with the things you usually do for fun? .....           | <input type="checkbox"/><br>1 | <input type="checkbox"/><br>2 | <input type="checkbox"/><br>3 | <input type="checkbox"/><br>4 | <input type="checkbox"/><br>5 |
| PAININ13 | How much did pain interfere with your family life?.....                             | <input type="checkbox"/><br>1 | <input type="checkbox"/><br>2 | <input type="checkbox"/><br>3 | <input type="checkbox"/><br>4 | <input type="checkbox"/><br>5 |
| PAININ17 | How much did pain interfere with your relationships with other people? .....        | <input type="checkbox"/><br>1 | <input type="checkbox"/><br>2 | <input type="checkbox"/><br>3 | <input type="checkbox"/><br>4 | <input type="checkbox"/><br>5 |
| PAININ18 | How much did pain interfere with your ability to work (include work at home)? ..... | <input type="checkbox"/><br>1 | <input type="checkbox"/><br>2 | <input type="checkbox"/><br>3 | <input type="checkbox"/><br>4 | <input type="checkbox"/><br>5 |
| PAININ19 | How much did pain make it difficult to fall asleep?.....                            | <input type="checkbox"/><br>1 | <input type="checkbox"/><br>2 | <input type="checkbox"/><br>3 | <input type="checkbox"/><br>4 | <input type="checkbox"/><br>5 |
| PAININ20 | How much did pain feel like a burden to you?.....                                   | <input type="checkbox"/><br>1 | <input type="checkbox"/><br>2 | <input type="checkbox"/><br>3 | <input type="checkbox"/><br>4 | <input type="checkbox"/><br>5 |
| PAININ22 | How much did pain interfere with work around the home?.....                         | <input type="checkbox"/><br>1 | <input type="checkbox"/><br>2 | <input type="checkbox"/><br>3 | <input type="checkbox"/><br>4 | <input type="checkbox"/><br>5 |

**In the past 7 days...**

|          |                                                                                                                       | Not at all                    | A little bit                  | Somewhat                      | Quite a bit                   | Very much                     |
|----------|-----------------------------------------------------------------------------------------------------------------------|-------------------------------|-------------------------------|-------------------------------|-------------------------------|-------------------------------|
| PAININ31 | How much did pain interfere with your ability to participate in social activities? .....                              | <input type="checkbox"/><br>1 | <input type="checkbox"/><br>2 | <input type="checkbox"/><br>3 | <input type="checkbox"/><br>4 | <input type="checkbox"/><br>5 |
| PAININ34 | How much did pain interfere with your household chores?.....                                                          | <input type="checkbox"/><br>1 | <input type="checkbox"/><br>2 | <input type="checkbox"/><br>3 | <input type="checkbox"/><br>4 | <input type="checkbox"/><br>5 |
| PAININ35 | How much did pain interfere with your ability to make trips from home that kept you gone for more than 2 hours? ..... | <input type="checkbox"/><br>1 | <input type="checkbox"/><br>2 | <input type="checkbox"/><br>3 | <input type="checkbox"/><br>4 | <input type="checkbox"/><br>5 |
| PAININ36 | How much did pain interfere with your enjoyment of social activities?.....                                            | <input type="checkbox"/><br>1 | <input type="checkbox"/><br>2 | <input type="checkbox"/><br>3 | <input type="checkbox"/><br>4 | <input type="checkbox"/><br>5 |
| PAININ48 | How much did pain interfere with your ability to do household chores?.....                                            | <input type="checkbox"/><br>1 | <input type="checkbox"/><br>2 | <input type="checkbox"/><br>3 | <input type="checkbox"/><br>4 | <input type="checkbox"/><br>5 |
| PAININ49 | How much did pain interfere with your ability to remember things?.....                                                | <input type="checkbox"/><br>1 | <input type="checkbox"/><br>2 | <input type="checkbox"/><br>3 | <input type="checkbox"/><br>4 | <input type="checkbox"/><br>5 |
| PAININ56 | How irritable did you feel because of pain?.....                                                                      | <input type="checkbox"/><br>1 | <input type="checkbox"/><br>2 | <input type="checkbox"/><br>3 | <input type="checkbox"/><br>4 | <input type="checkbox"/><br>5 |
| PAININ14 | How much did pain interfere with doing your tasks away from home (e.g., getting groceries, running errands)?.....     | <input type="checkbox"/><br>1 | <input type="checkbox"/><br>2 | <input type="checkbox"/><br>3 | <input type="checkbox"/><br>4 | <input type="checkbox"/><br>5 |

**In the past 7 days...**

|          |                                                                                      | Never                         | Rarely                        | Sometimes                     | Often                         | Always                        |
|----------|--------------------------------------------------------------------------------------|-------------------------------|-------------------------------|-------------------------------|-------------------------------|-------------------------------|
| PAININ16 | How often did pain make you feel depressed? .....                                    | <input type="checkbox"/><br>1 | <input type="checkbox"/><br>2 | <input type="checkbox"/><br>3 | <input type="checkbox"/><br>4 | <input type="checkbox"/><br>5 |
| PAININ24 | How often was pain distressing to you? .....                                         | <input type="checkbox"/><br>1 | <input type="checkbox"/><br>2 | <input type="checkbox"/><br>3 | <input type="checkbox"/><br>4 | <input type="checkbox"/><br>5 |
| PAININ26 | How often did pain keep you from socializing with others?.....                       | <input type="checkbox"/><br>1 | <input type="checkbox"/><br>2 | <input type="checkbox"/><br>3 | <input type="checkbox"/><br>4 | <input type="checkbox"/><br>5 |
| PAININ29 | How often was your pain so severe you could think of nothing else?.....              | <input type="checkbox"/><br>1 | <input type="checkbox"/><br>2 | <input type="checkbox"/><br>3 | <input type="checkbox"/><br>4 | <input type="checkbox"/><br>5 |
| PAININ32 | How often did pain make you feel discouraged? .....                                  | <input type="checkbox"/><br>1 | <input type="checkbox"/><br>2 | <input type="checkbox"/><br>3 | <input type="checkbox"/><br>4 | <input type="checkbox"/><br>5 |
| PAININ37 | How often did pain make you feel anxious? .....                                      | <input type="checkbox"/><br>1 | <input type="checkbox"/><br>2 | <input type="checkbox"/><br>3 | <input type="checkbox"/><br>4 | <input type="checkbox"/><br>5 |
| PAININ38 | How often did you avoid social activities because it might make you hurt more? ..... | <input type="checkbox"/><br>1 | <input type="checkbox"/><br>2 | <input type="checkbox"/><br>3 | <input type="checkbox"/><br>4 | <input type="checkbox"/><br>5 |
| PAININ40 | How often did pain prevent you from walking more than 1 mile?.....                   | <input type="checkbox"/><br>1 | <input type="checkbox"/><br>2 | <input type="checkbox"/><br>3 | <input type="checkbox"/><br>4 | <input type="checkbox"/><br>5 |
| PAININ42 | How often did pain prevent you from standing for more than one hour? .....           | <input type="checkbox"/><br>1 | <input type="checkbox"/><br>2 | <input type="checkbox"/><br>3 | <input type="checkbox"/><br>4 | <input type="checkbox"/><br>5 |

**In the past 7 days...**

|          |                                                                                                        | Never                         | Rarely                        | Sometimes                     | Often                         | Always                        |
|----------|--------------------------------------------------------------------------------------------------------|-------------------------------|-------------------------------|-------------------------------|-------------------------------|-------------------------------|
| PAININ46 | How often did pain make it difficult for you to plan social activities? .....                          | <input type="checkbox"/><br>1 | <input type="checkbox"/><br>2 | <input type="checkbox"/><br>3 | <input type="checkbox"/><br>4 | <input type="checkbox"/><br>5 |
| PAININ47 | How often did pain prevent you from standing for more than 30 minutes? .....                           | <input type="checkbox"/><br>1 | <input type="checkbox"/><br>2 | <input type="checkbox"/><br>3 | <input type="checkbox"/><br>4 | <input type="checkbox"/><br>5 |
| PAININ50 | How often did pain prevent you from sitting for more than 30 minutes? .....                            | <input type="checkbox"/><br>1 | <input type="checkbox"/><br>2 | <input type="checkbox"/><br>3 | <input type="checkbox"/><br>4 | <input type="checkbox"/><br>5 |
| PAININ51 | How often did pain prevent you from sitting for more than 10 minutes? .....                            | <input type="checkbox"/><br>1 | <input type="checkbox"/><br>2 | <input type="checkbox"/><br>3 | <input type="checkbox"/><br>4 | <input type="checkbox"/><br>5 |
| PAININ52 | How often was it hard to plan social activities because you didn't know if you would be in pain? ..... | <input type="checkbox"/><br>1 | <input type="checkbox"/><br>2 | <input type="checkbox"/><br>3 | <input type="checkbox"/><br>4 | <input type="checkbox"/><br>5 |
| PAININ53 | How often did pain restrict your social life to your home?.....                                        | <input type="checkbox"/><br>1 | <input type="checkbox"/><br>2 | <input type="checkbox"/><br>3 | <input type="checkbox"/><br>4 | <input type="checkbox"/><br>5 |
| PAININ55 | How often did pain prevent you from sitting for more than one hour?.....                               | <input type="checkbox"/><br>1 | <input type="checkbox"/><br>2 | <input type="checkbox"/><br>3 | <input type="checkbox"/><br>4 | <input type="checkbox"/><br>5 |
|          | <b>In the past 7 days...</b>                                                                           |                               |                               |                               |                               |                               |
|          |                                                                                                        | Never                         | Once a week or less           | Once every few days           | Once a day                    | Every few hours               |
| PAININ54 | How often did pain keep you from getting into a standing position? .....                               | <input type="checkbox"/><br>1 | <input type="checkbox"/><br>2 | <input type="checkbox"/><br>3 | <input type="checkbox"/><br>4 | <input type="checkbox"/><br>5 |



**Fatigue – Calibrated Items****Please respond to each item by marking one box per row.****In the past 7 days...**

|          |                                                                       | Never                         | Rarely                        | Sometimes                     | Often                         | Always                        |
|----------|-----------------------------------------------------------------------|-------------------------------|-------------------------------|-------------------------------|-------------------------------|-------------------------------|
| FATEXP2  | How often did you feel run-down?.....                                 | <input type="checkbox"/><br>1 | <input type="checkbox"/><br>2 | <input type="checkbox"/><br>3 | <input type="checkbox"/><br>4 | <input type="checkbox"/><br>5 |
| FATEXP5  | How often did you experience extreme exhaustion?.....                 | <input type="checkbox"/><br>1 | <input type="checkbox"/><br>2 | <input type="checkbox"/><br>3 | <input type="checkbox"/><br>4 | <input type="checkbox"/><br>5 |
| FATEXP6  | How often did you feel tired even when you hadn't done anything?..... | <input type="checkbox"/><br>1 | <input type="checkbox"/><br>2 | <input type="checkbox"/><br>3 | <input type="checkbox"/><br>4 | <input type="checkbox"/><br>5 |
| FATEXP7  | How often did you feel your fatigue was beyond your control?.....     | <input type="checkbox"/><br>1 | <input type="checkbox"/><br>2 | <input type="checkbox"/><br>3 | <input type="checkbox"/><br>4 | <input type="checkbox"/><br>5 |
| FATEXP16 | How often were you sluggish?.....                                     | <input type="checkbox"/><br>1 | <input type="checkbox"/><br>2 | <input type="checkbox"/><br>3 | <input type="checkbox"/><br>4 | <input type="checkbox"/><br>5 |
| FATEXP18 | How often did you run out of energy?.....                             | <input type="checkbox"/><br>1 | <input type="checkbox"/><br>2 | <input type="checkbox"/><br>3 | <input type="checkbox"/><br>4 | <input type="checkbox"/><br>5 |
| FATEXP19 | How often were you physically drained?.....                           | <input type="checkbox"/><br>1 | <input type="checkbox"/><br>2 | <input type="checkbox"/><br>3 | <input type="checkbox"/><br>4 | <input type="checkbox"/><br>5 |
| FATEXP20 | How often did you feel tired?.....                                    | <input type="checkbox"/><br>1 | <input type="checkbox"/><br>2 | <input type="checkbox"/><br>3 | <input type="checkbox"/><br>4 | <input type="checkbox"/><br>5 |

**In the past 7 days...**

|          |                                                                               | Never                         | Rarely                        | Sometimes                     | Often                         | Always                        |
|----------|-------------------------------------------------------------------------------|-------------------------------|-------------------------------|-------------------------------|-------------------------------|-------------------------------|
| FATEXP22 | How often were you bothered by your fatigue?.....                             | <input type="checkbox"/><br>1 | <input type="checkbox"/><br>2 | <input type="checkbox"/><br>3 | <input type="checkbox"/><br>4 | <input type="checkbox"/><br>5 |
| FATEXP24 | How often did you have enough energy to enjoy the things you do for fun?..... | <input type="checkbox"/><br>5 | <input type="checkbox"/><br>4 | <input type="checkbox"/><br>3 | <input type="checkbox"/><br>2 | <input type="checkbox"/><br>1 |
| FATEXP26 | How often were you too tired to enjoy life?.....                              | <input type="checkbox"/><br>1 | <input type="checkbox"/><br>2 | <input type="checkbox"/><br>3 | <input type="checkbox"/><br>4 | <input type="checkbox"/><br>5 |
| FATEXP28 | How often were you too tired to feel happy?.....                              | <input type="checkbox"/><br>1 | <input type="checkbox"/><br>2 | <input type="checkbox"/><br>3 | <input type="checkbox"/><br>4 | <input type="checkbox"/><br>5 |
| FATEXP29 | How often did you feel totally drained?....                                   | <input type="checkbox"/><br>1 | <input type="checkbox"/><br>2 | <input type="checkbox"/><br>3 | <input type="checkbox"/><br>4 | <input type="checkbox"/><br>5 |
| FATEXP31 | How often were you energetic?.....                                            | <input type="checkbox"/><br>5 | <input type="checkbox"/><br>4 | <input type="checkbox"/><br>3 | <input type="checkbox"/><br>2 | <input type="checkbox"/><br>1 |
| FATEXP48 | How often did you find yourself getting tired easily?.....                    | <input type="checkbox"/><br>1 | <input type="checkbox"/><br>2 | <input type="checkbox"/><br>3 | <input type="checkbox"/><br>4 | <input type="checkbox"/><br>5 |
| FATEXP49 | How often did you think about your fatigue?.....                              | <input type="checkbox"/><br>1 | <input type="checkbox"/><br>2 | <input type="checkbox"/><br>3 | <input type="checkbox"/><br>4 | <input type="checkbox"/><br>5 |
| FATEXP54 | How often did you have physical energy?.....                                  | <input type="checkbox"/><br>5 | <input type="checkbox"/><br>4 | <input type="checkbox"/><br>3 | <input type="checkbox"/><br>2 | <input type="checkbox"/><br>1 |

**In the past 7 days....**

|          |                                                                                            | Never                         | Rarely                        | Sometimes                     | Often                         | Always                        |
|----------|--------------------------------------------------------------------------------------------|-------------------------------|-------------------------------|-------------------------------|-------------------------------|-------------------------------|
| FATIMP3  | How often did you have to push yourself to get things done because of your fatigue?.....   | <input type="checkbox"/><br>1 | <input type="checkbox"/><br>2 | <input type="checkbox"/><br>3 | <input type="checkbox"/><br>4 | <input type="checkbox"/><br>5 |
| FATIMP4  | How often did your fatigue interfere with your social activities?.....                     | <input type="checkbox"/><br>1 | <input type="checkbox"/><br>2 | <input type="checkbox"/><br>3 | <input type="checkbox"/><br>4 | <input type="checkbox"/><br>5 |
| FATIMP5  | How often were you less effective at work due to your fatigue (include work at home)?..... | <input type="checkbox"/><br>1 | <input type="checkbox"/><br>2 | <input type="checkbox"/><br>3 | <input type="checkbox"/><br>4 | <input type="checkbox"/><br>5 |
| FATIMP6  | How often did your fatigue make you feel slowed down in your thinking?.....                | <input type="checkbox"/><br>1 | <input type="checkbox"/><br>2 | <input type="checkbox"/><br>3 | <input type="checkbox"/><br>4 | <input type="checkbox"/><br>5 |
| FATIMP8  | How often were you too tired to watch television? .....                                    | <input type="checkbox"/><br>1 | <input type="checkbox"/><br>2 | <input type="checkbox"/><br>3 | <input type="checkbox"/><br>4 | <input type="checkbox"/><br>5 |
| FATIMP9  | How often did your fatigue make it difficult to plan activities ahead of time?.....        | <input type="checkbox"/><br>1 | <input type="checkbox"/><br>2 | <input type="checkbox"/><br>3 | <input type="checkbox"/><br>4 | <input type="checkbox"/><br>5 |
| FATIMP10 | How often did your fatigue make it difficult to start anything new?.....                   | <input type="checkbox"/><br>1 | <input type="checkbox"/><br>2 | <input type="checkbox"/><br>3 | <input type="checkbox"/><br>4 | <input type="checkbox"/><br>5 |
| FATIMP11 | How often did your fatigue make you more forgetful?.....                                   | <input type="checkbox"/><br>1 | <input type="checkbox"/><br>2 | <input type="checkbox"/><br>3 | <input type="checkbox"/><br>4 | <input type="checkbox"/><br>5 |

**In the past 7 days...**

|          |                                                                                                                               | Never                         | Rarely                        | Sometimes                     | Often                         | Always                        |
|----------|-------------------------------------------------------------------------------------------------------------------------------|-------------------------------|-------------------------------|-------------------------------|-------------------------------|-------------------------------|
| FATIMP13 | How often were you too tired to do errands?.....                                                                              | <input type="checkbox"/><br>1 | <input type="checkbox"/><br>2 | <input type="checkbox"/><br>3 | <input type="checkbox"/><br>4 | <input type="checkbox"/><br>5 |
| FATIMP14 | How often did your fatigue make it difficult to organize your thoughts when doing things at work (include work at home)?..... | <input type="checkbox"/><br>1 | <input type="checkbox"/><br>2 | <input type="checkbox"/><br>3 | <input type="checkbox"/><br>4 | <input type="checkbox"/><br>5 |
| FATIMP15 | How often did your fatigue interfere with your ability to engage in recreational activities?.....                             | <input type="checkbox"/><br>1 | <input type="checkbox"/><br>2 | <input type="checkbox"/><br>3 | <input type="checkbox"/><br>4 | <input type="checkbox"/><br>5 |
| FATIMP16 | How often did you have trouble finishing things because of your fatigue?.....                                                 | <input type="checkbox"/><br>1 | <input type="checkbox"/><br>2 | <input type="checkbox"/><br>3 | <input type="checkbox"/><br>4 | <input type="checkbox"/><br>5 |
| FATIMP17 | How often did your fatigue make it difficult to make decisions?.....                                                          | <input type="checkbox"/><br>1 | <input type="checkbox"/><br>2 | <input type="checkbox"/><br>3 | <input type="checkbox"/><br>4 | <input type="checkbox"/><br>5 |
| FATIMP18 | How often did you have to limit your social activities because of your fatigue?.....                                          | <input type="checkbox"/><br>1 | <input type="checkbox"/><br>2 | <input type="checkbox"/><br>3 | <input type="checkbox"/><br>4 | <input type="checkbox"/><br>5 |

**In the past 7 days...**

|          |                                                                                                        | Never                         | Rarely                        | Sometimes                     | Often                         | Always                        |
|----------|--------------------------------------------------------------------------------------------------------|-------------------------------|-------------------------------|-------------------------------|-------------------------------|-------------------------------|
| FATIMP19 | How often were you too tired to do your household chores?.....                                         | <input type="checkbox"/><br>1 | <input type="checkbox"/><br>2 | <input type="checkbox"/><br>3 | <input type="checkbox"/><br>4 | <input type="checkbox"/><br>5 |
| FATIMP20 | How often did your fatigue make you feel less alert?.....                                              | <input type="checkbox"/><br>1 | <input type="checkbox"/><br>2 | <input type="checkbox"/><br>3 | <input type="checkbox"/><br>4 | <input type="checkbox"/><br>5 |
| FATIMP21 | How often were you too tired to take a bath or shower?.....                                            | <input type="checkbox"/><br>1 | <input type="checkbox"/><br>2 | <input type="checkbox"/><br>3 | <input type="checkbox"/><br>4 | <input type="checkbox"/><br>5 |
| FATIMP22 | How often did your fatigue make it difficult to organize your thoughts when doing things at home?..... | <input type="checkbox"/><br>1 | <input type="checkbox"/><br>2 | <input type="checkbox"/><br>3 | <input type="checkbox"/><br>4 | <input type="checkbox"/><br>5 |
| FATIMP24 | How often did you have trouble starting things because of your fatigue?.....                           | <input type="checkbox"/><br>1 | <input type="checkbox"/><br>2 | <input type="checkbox"/><br>3 | <input type="checkbox"/><br>4 | <input type="checkbox"/><br>5 |
| FATIMP25 | How often was it an effort to carry on a conversation because of your fatigue?.....                    | <input type="checkbox"/><br>1 | <input type="checkbox"/><br>2 | <input type="checkbox"/><br>3 | <input type="checkbox"/><br>4 | <input type="checkbox"/><br>5 |
| FATIMP26 | How often were you too tired to socialize with your family?.....                                       | <input type="checkbox"/><br>1 | <input type="checkbox"/><br>2 | <input type="checkbox"/><br>3 | <input type="checkbox"/><br>4 | <input type="checkbox"/><br>5 |
| FATIMP29 | How often were you too tired to leave the house?.....                                                  | <input type="checkbox"/><br>1 | <input type="checkbox"/><br>2 | <input type="checkbox"/><br>3 | <input type="checkbox"/><br>4 | <input type="checkbox"/><br>5 |

**In the past 7 days...**

|          |                                                                                                | Never                         | Rarely                        | Sometimes                     | Often                         | Always                        |
|----------|------------------------------------------------------------------------------------------------|-------------------------------|-------------------------------|-------------------------------|-------------------------------|-------------------------------|
| FATIMP30 | How often were you too tired to think clearly?.....                                            | <input type="checkbox"/><br>1 | <input type="checkbox"/><br>2 | <input type="checkbox"/><br>3 | <input type="checkbox"/><br>4 | <input type="checkbox"/><br>5 |
| FATIMP33 | How often did your fatigue limit you at work (include work at home)?.....                      | <input type="checkbox"/><br>1 | <input type="checkbox"/><br>2 | <input type="checkbox"/><br>3 | <input type="checkbox"/><br>4 | <input type="checkbox"/><br>5 |
| FATIMP40 | How often did you have enough energy to exercise strenuously? .....                            | <input type="checkbox"/><br>5 | <input type="checkbox"/><br>4 | <input type="checkbox"/><br>3 | <input type="checkbox"/><br>2 | <input type="checkbox"/><br>1 |
| FATIMP42 | How often were you less effective at home due to your fatigue?.....                            | <input type="checkbox"/><br>1 | <input type="checkbox"/><br>2 | <input type="checkbox"/><br>3 | <input type="checkbox"/><br>4 | <input type="checkbox"/><br>5 |
| FATIMP53 | How often were you too tired to take a short walk?.....                                        | <input type="checkbox"/><br>1 | <input type="checkbox"/><br>2 | <input type="checkbox"/><br>3 | <input type="checkbox"/><br>4 | <input type="checkbox"/><br>5 |
| FATIMP55 | How often did you have to force yourself to get up and do things because of your fatigue?..... | <input type="checkbox"/><br>1 | <input type="checkbox"/><br>2 | <input type="checkbox"/><br>3 | <input type="checkbox"/><br>4 | <input type="checkbox"/><br>5 |
| FATIMP56 | How often were you too tired to socialize with your friends?.....                              | <input type="checkbox"/><br>1 | <input type="checkbox"/><br>2 | <input type="checkbox"/><br>3 | <input type="checkbox"/><br>4 | <input type="checkbox"/><br>5 |

**During the past 7 days...**

|      |                                                                       | Not at all                    | A little bit                  | Somewhat                      | Quite a bit                   | Very much                     |
|------|-----------------------------------------------------------------------|-------------------------------|-------------------------------|-------------------------------|-------------------------------|-------------------------------|
| AN1  | I feel listless ("washed out").....                                   | <input type="checkbox"/><br>1 | <input type="checkbox"/><br>2 | <input type="checkbox"/><br>3 | <input type="checkbox"/><br>4 | <input type="checkbox"/><br>5 |
| AN2  | I feel tired.....                                                     | <input type="checkbox"/><br>1 | <input type="checkbox"/><br>2 | <input type="checkbox"/><br>3 | <input type="checkbox"/><br>4 | <input type="checkbox"/><br>5 |
| AN3  | I have trouble <u>starting</u> things because I am tired.....         | <input type="checkbox"/><br>1 | <input type="checkbox"/><br>2 | <input type="checkbox"/><br>3 | <input type="checkbox"/><br>4 | <input type="checkbox"/><br>5 |
| AN4  | I have trouble finishing things because I am tired.....               | <input type="checkbox"/><br>1 | <input type="checkbox"/><br>2 | <input type="checkbox"/><br>3 | <input type="checkbox"/><br>4 | <input type="checkbox"/><br>5 |
| AN5  | I have energy.....                                                    | <input type="checkbox"/><br>5 | <input type="checkbox"/><br>4 | <input type="checkbox"/><br>3 | <input type="checkbox"/><br>2 | <input type="checkbox"/><br>1 |
| AN7  | I am able to do my usual activities.....                              | <input type="checkbox"/><br>5 | <input type="checkbox"/><br>4 | <input type="checkbox"/><br>3 | <input type="checkbox"/><br>2 | <input type="checkbox"/><br>1 |
| AN8  | I need to sleep during the day.....                                   | <input type="checkbox"/><br>1 | <input type="checkbox"/><br>2 | <input type="checkbox"/><br>3 | <input type="checkbox"/><br>4 | <input type="checkbox"/><br>5 |
| AN12 | I am too tired to eat.....                                            | <input type="checkbox"/><br>1 | <input type="checkbox"/><br>2 | <input type="checkbox"/><br>3 | <input type="checkbox"/><br>4 | <input type="checkbox"/><br>5 |
| AN14 | I need help doing my usual activities.....                            | <input type="checkbox"/><br>1 | <input type="checkbox"/><br>2 | <input type="checkbox"/><br>3 | <input type="checkbox"/><br>4 | <input type="checkbox"/><br>5 |
| AN15 | I am frustrated by being too tired to do the things I want to do..... | <input type="checkbox"/><br>1 | <input type="checkbox"/><br>2 | <input type="checkbox"/><br>3 | <input type="checkbox"/><br>4 | <input type="checkbox"/><br>5 |

**During the past 7 days...**

|          |                                                                            | Not at all                    | A little bit                  | Somewhat                      | Quite a bit                   | Very much                     |
|----------|----------------------------------------------------------------------------|-------------------------------|-------------------------------|-------------------------------|-------------------------------|-------------------------------|
| AN16     | I have to limit my social activity because I am tired.....                 | <input type="checkbox"/><br>1 | <input type="checkbox"/><br>2 | <input type="checkbox"/><br>3 | <input type="checkbox"/><br>4 | <input type="checkbox"/><br>5 |
|          | <b>In the past 7 days...</b>                                               |                               |                               |                               |                               |                               |
| FATEXP12 | To what degree did you feel tired even when you hadn't done anything?..... | <input type="checkbox"/><br>1 | <input type="checkbox"/><br>2 | <input type="checkbox"/><br>3 | <input type="checkbox"/><br>4 | <input type="checkbox"/><br>5 |
| FATEXP13 | How bushed were you on average?.....                                       | <input type="checkbox"/><br>1 | <input type="checkbox"/><br>2 | <input type="checkbox"/><br>3 | <input type="checkbox"/><br>4 | <input type="checkbox"/><br>5 |
| FATEXP21 | How fatigued were you when your fatigue was at its worst?.....             | <input type="checkbox"/><br>1 | <input type="checkbox"/><br>2 | <input type="checkbox"/><br>3 | <input type="checkbox"/><br>4 | <input type="checkbox"/><br>5 |
| FATEXP34 | How tired did you feel on average?.....                                    | <input type="checkbox"/><br>1 | <input type="checkbox"/><br>2 | <input type="checkbox"/><br>3 | <input type="checkbox"/><br>4 | <input type="checkbox"/><br>5 |
| FATEXP35 | How much were you bothered by your fatigue on average?.....                | <input type="checkbox"/><br>1 | <input type="checkbox"/><br>2 | <input type="checkbox"/><br>3 | <input type="checkbox"/><br>4 | <input type="checkbox"/><br>5 |
| FATEXP36 | How exhausted were you on average?.....                                    | <input type="checkbox"/><br>1 | <input type="checkbox"/><br>2 | <input type="checkbox"/><br>3 | <input type="checkbox"/><br>4 | <input type="checkbox"/><br>5 |
| FATEXP38 | How fatigued were you on the day you felt most fatigued?.....              | <input type="checkbox"/><br>1 | <input type="checkbox"/><br>2 | <input type="checkbox"/><br>3 | <input type="checkbox"/><br>4 | <input type="checkbox"/><br>5 |



**In the past 7 days...**

|          |                                                                 | Not at all                    | A little bit                  | Somewhat                      | Quite a bit                   | Very much                     |
|----------|-----------------------------------------------------------------|-------------------------------|-------------------------------|-------------------------------|-------------------------------|-------------------------------|
| FATEXP40 | How fatigued were you on average?.....                          | <input type="checkbox"/><br>1 | <input type="checkbox"/><br>2 | <input type="checkbox"/><br>3 | <input type="checkbox"/><br>4 | <input type="checkbox"/><br>5 |
| FATEXP41 | How run-down did you feel on average?.....                      | <input type="checkbox"/><br>1 | <input type="checkbox"/><br>2 | <input type="checkbox"/><br>3 | <input type="checkbox"/><br>4 | <input type="checkbox"/><br>5 |
| FATEXP42 | How much mental energy did you have on average?.....            | <input type="checkbox"/><br>5 | <input type="checkbox"/><br>4 | <input type="checkbox"/><br>3 | <input type="checkbox"/><br>2 | <input type="checkbox"/><br>1 |
| FATEXP43 | How physically drained were you on average?.....                | <input type="checkbox"/><br>1 | <input type="checkbox"/><br>2 | <input type="checkbox"/><br>3 | <input type="checkbox"/><br>4 | <input type="checkbox"/><br>5 |
| FATEXP44 | How energetic were you on average?.....                         | <input type="checkbox"/><br>5 | <input type="checkbox"/><br>4 | <input type="checkbox"/><br>3 | <input type="checkbox"/><br>2 | <input type="checkbox"/><br>1 |
| FATEXP45 | How sluggish were you on average?.....                          | <input type="checkbox"/><br>1 | <input type="checkbox"/><br>2 | <input type="checkbox"/><br>3 | <input type="checkbox"/><br>4 | <input type="checkbox"/><br>5 |
| FATEXP50 | How fatigued were you on the day you felt least fatigued?.....  | <input type="checkbox"/><br>1 | <input type="checkbox"/><br>2 | <input type="checkbox"/><br>3 | <input type="checkbox"/><br>4 | <input type="checkbox"/><br>5 |
| FATEXP51 | How easily did you find yourself getting tired on average?..... | <input type="checkbox"/><br>1 | <input type="checkbox"/><br>2 | <input type="checkbox"/><br>3 | <input type="checkbox"/><br>4 | <input type="checkbox"/><br>5 |
| FATEXP52 | How wiped out were you on average? .....                        | <input type="checkbox"/><br>1 | <input type="checkbox"/><br>2 | <input type="checkbox"/><br>3 | <input type="checkbox"/><br>4 | <input type="checkbox"/><br>5 |

**In the past 7 days...**

|          |                                                                                                             | Not at all                    | A little bit                  | Somewhat                      | Quite a bit                   | Very much                     |
|----------|-------------------------------------------------------------------------------------------------------------|-------------------------------|-------------------------------|-------------------------------|-------------------------------|-------------------------------|
| FATIMP1  | To what degree did you have to push yourself to get things done because of your fatigue?.....               | <input type="checkbox"/><br>1 | <input type="checkbox"/><br>2 | <input type="checkbox"/><br>3 | <input type="checkbox"/><br>4 | <input type="checkbox"/><br>5 |
| FATIMP2  | To what degree did your fatigue make you feel slowed down in your thinking?.....                            | <input type="checkbox"/><br>1 | <input type="checkbox"/><br>2 | <input type="checkbox"/><br>3 | <input type="checkbox"/><br>4 | <input type="checkbox"/><br>5 |
| FATIMP27 | To what degree did you have trouble starting things because of your fatigue?...                             | <input type="checkbox"/><br>1 | <input type="checkbox"/><br>2 | <input type="checkbox"/><br>3 | <input type="checkbox"/><br>4 | <input type="checkbox"/><br>5 |
| FATIMP28 | How hard was it for you to carry on a conversation because of your fatigue?....                             | <input type="checkbox"/><br>1 | <input type="checkbox"/><br>2 | <input type="checkbox"/><br>3 | <input type="checkbox"/><br>4 | <input type="checkbox"/><br>5 |
| FATIMP34 | To what degree did you have to limit your social activities because of your fatigue?.....                   | <input type="checkbox"/><br>1 | <input type="checkbox"/><br>2 | <input type="checkbox"/><br>3 | <input type="checkbox"/><br>4 | <input type="checkbox"/><br>5 |
| FATIMP35 | To what degree did your fatigue make it difficult to organize your thoughts when doing things at home?..... | <input type="checkbox"/><br>1 | <input type="checkbox"/><br>2 | <input type="checkbox"/><br>3 | <input type="checkbox"/><br>4 | <input type="checkbox"/><br>5 |
| FATIMP36 | To what degree did your fatigue make it difficult to start anything new?.....                               | <input type="checkbox"/><br>1 | <input type="checkbox"/><br>2 | <input type="checkbox"/><br>3 | <input type="checkbox"/><br>4 | <input type="checkbox"/><br>5 |

**In the past 7 days...**

|          |                                                                                                                                    | Not at all                    | A little bit                  | Somewhat                      | Quite a bit                   | Very much                     |
|----------|------------------------------------------------------------------------------------------------------------------------------------|-------------------------------|-------------------------------|-------------------------------|-------------------------------|-------------------------------|
| FATIMP37 | Due to your fatigue were you less effective at work (include work at home)?.....                                                   | <input type="checkbox"/><br>1 | <input type="checkbox"/><br>2 | <input type="checkbox"/><br>3 | <input type="checkbox"/><br>4 | <input type="checkbox"/><br>5 |
| FATIMP38 | To what degree did your fatigue make it difficult to make decisions?.....                                                          | <input type="checkbox"/><br>1 | <input type="checkbox"/><br>2 | <input type="checkbox"/><br>3 | <input type="checkbox"/><br>4 | <input type="checkbox"/><br>5 |
| FATIMP43 | To what degree did your fatigue make it difficult to organize your thoughts when doing things at work (include work at home)?..... | <input type="checkbox"/><br>1 | <input type="checkbox"/><br>2 | <input type="checkbox"/><br>3 | <input type="checkbox"/><br>4 | <input type="checkbox"/><br>5 |
| FATIMP44 | To what degree did your fatigue make you more forgetful?.....                                                                      | <input type="checkbox"/><br>1 | <input type="checkbox"/><br>2 | <input type="checkbox"/><br>3 | <input type="checkbox"/><br>4 | <input type="checkbox"/><br>5 |
| FATIMP45 | To what degree did your fatigue interfere with your ability to engage in recreational activities?.....                             | <input type="checkbox"/><br>1 | <input type="checkbox"/><br>2 | <input type="checkbox"/><br>3 | <input type="checkbox"/><br>4 | <input type="checkbox"/><br>5 |
| FATIMP47 | To what degree did you have to force yourself to get up and do things because of your fatigue?.....                                | <input type="checkbox"/><br>1 | <input type="checkbox"/><br>2 | <input type="checkbox"/><br>3 | <input type="checkbox"/><br>4 | <input type="checkbox"/><br>5 |
| FATIMP48 | To what degree did your fatigue interfere with your social activities?.....                                                        | <input type="checkbox"/><br>1 | <input type="checkbox"/><br>2 | <input type="checkbox"/><br>3 | <input type="checkbox"/><br>4 | <input type="checkbox"/><br>5 |

**In the past 7 days...**

|          |                                                                                    | Not at all                    | A little bit                  | Somewhat                      | Quite a bit                   | Very much                     |
|----------|------------------------------------------------------------------------------------|-------------------------------|-------------------------------|-------------------------------|-------------------------------|-------------------------------|
| FATIMP49 | To what degree did your fatigue interfere with your physical functioning?.....     | <input type="checkbox"/><br>1 | <input type="checkbox"/><br>2 | <input type="checkbox"/><br>3 | <input type="checkbox"/><br>4 | <input type="checkbox"/><br>5 |
| FATIMP50 | Did fatigue make you less effective at home?.....                                  | <input type="checkbox"/><br>1 | <input type="checkbox"/><br>2 | <input type="checkbox"/><br>3 | <input type="checkbox"/><br>4 | <input type="checkbox"/><br>5 |
| FATIMP51 | To what degree did you have trouble finishing things because of your fatigue?..... | <input type="checkbox"/><br>1 | <input type="checkbox"/><br>2 | <input type="checkbox"/><br>3 | <input type="checkbox"/><br>4 | <input type="checkbox"/><br>5 |
| FATIMP52 | To what degree did your fatigue make you feel less alert?.....                     | <input type="checkbox"/><br>1 | <input type="checkbox"/><br>2 | <input type="checkbox"/><br>3 | <input type="checkbox"/><br>4 | <input type="checkbox"/><br>5 |

**During the past 7 days...**

|      |                            |                               |                               |                               |                               |                               |
|------|----------------------------|-------------------------------|-------------------------------|-------------------------------|-------------------------------|-------------------------------|
| HI7  | I feel fatigued.....       | <input type="checkbox"/><br>1 | <input type="checkbox"/><br>2 | <input type="checkbox"/><br>3 | <input type="checkbox"/><br>4 | <input type="checkbox"/><br>5 |
| HI12 | I feel weak all over ..... | <input type="checkbox"/><br>1 | <input type="checkbox"/><br>2 | <input type="checkbox"/><br>3 | <input type="checkbox"/><br>4 | <input type="checkbox"/><br>5 |

**In the past 7 days...**

|          |                                                              | None                          | 1 day                         | 2-3 days                      | 4-5 days                      | 6-7 days                      |
|----------|--------------------------------------------------------------|-------------------------------|-------------------------------|-------------------------------|-------------------------------|-------------------------------|
| FATEXP46 | On how many days was your fatigue worse in the morning?..... | <input type="checkbox"/><br>1 | <input type="checkbox"/><br>2 | <input type="checkbox"/><br>3 | <input type="checkbox"/><br>4 | <input type="checkbox"/><br>5 |

  

|          |                                                       | None                          | Mild                          | Moderate                      | Severe                        | Very severe                   |
|----------|-------------------------------------------------------|-------------------------------|-------------------------------|-------------------------------|-------------------------------|-------------------------------|
| FATEXP56 | What was the level of your fatigue on most days?..... | <input type="checkbox"/><br>1 | <input type="checkbox"/><br>2 | <input type="checkbox"/><br>3 | <input type="checkbox"/><br>4 | <input type="checkbox"/><br>5 |

Table S6: PROMIS® Item Bank v1.0 – Physical Function with Mobility

PROMIS® Item Bank v1.0 – Physical Function with Mobility

**PROMIS Physical Function with Mobility****Please respond to each item by marking one box per row.**

|                                                                                                                                                                                                   |                                                                                            |                                                                                                                   |                                 |                               |                               |                               |  |
|---------------------------------------------------------------------------------------------------------------------------------------------------------------------------------------------------|--------------------------------------------------------------------------------------------|-------------------------------------------------------------------------------------------------------------------|---------------------------------|-------------------------------|-------------------------------|-------------------------------|--|
| The following questions ask about your ability to stand and move with and without support.<br>“Support” means using items such as canes, walking sticks, walkers and leg braces, or other people. |                                                                                            |                                                                                                                   |                                 |                               |                               |                               |  |
|                                                                                                                                                                                                   |                                                                                            | <b>Yes</b>                                                                                                        | <b>No</b>                       |                               |                               |                               |  |
| PF_Screener<br>1                                                                                                                                                                                  | Can you stand (with or without support)?                                                   | <input type="checkbox"/>                                                                                          | <input type="checkbox"/>        |                               |                               |                               |  |
|                                                                                                                                                                                                   |                                                                                            | Yes→ proceed to PF_Screener2<br>No→ proceed to CAT with items only from Group A                                   |                                 |                               |                               |                               |  |
| The following questions ask about your ability to stand and move with and without support.<br>“Support” means using items such as canes, walking sticks, walkers and leg braces, or other people. |                                                                                            |                                                                                                                   |                                 |                               |                               |                               |  |
|                                                                                                                                                                                                   |                                                                                            | <b>Yes</b>                                                                                                        | <b>No</b>                       |                               |                               |                               |  |
| PF_Screener<br>2                                                                                                                                                                                  | Can you walk 25 feet on a level surface (with or without support)?                         | <input type="checkbox"/>                                                                                          | <input type="checkbox"/>        |                               |                               |                               |  |
|                                                                                                                                                                                                   |                                                                                            | Yes→ proceed to CAT with all items (Groups A, B, and C)<br>No→ proceed to CAT with items only from Groups A and C |                                 |                               |                               |                               |  |
|                                                                                                                                                                                                   |                                                                                            |                                                                                                                   |                                 |                               |                               |                               |  |
|                                                                                                                                                                                                   |                                                                                            |                                                                                                                   |                                 |                               |                               |                               |  |
| <b>Group A Items (PF_1 thru PFC53)</b>                                                                                                                                                            |                                                                                            | <b>Without any difficulty</b>                                                                                     | <b>With a little difficulty</b> | <b>With some difficulty</b>   | <b>With much difficulty</b>   | <b>Unable to do</b>           |  |
| PF_1                                                                                                                                                                                              | Are you able to go OUTSIDE the home, for example to shop or visit a doctor’s office? ..... | <input type="checkbox"/><br>5                                                                                     | <input type="checkbox"/><br>4   | <input type="checkbox"/><br>3 | <input type="checkbox"/><br>2 | <input type="checkbox"/><br>1 |  |
| PF_10                                                                                                                                                                                             | Are you able to dial a number on a phone with large buttons? .....                         | <input type="checkbox"/><br>5                                                                                     | <input type="checkbox"/><br>4   | <input type="checkbox"/><br>3 | <input type="checkbox"/><br>2 | <input type="checkbox"/><br>1 |  |
| PF_11                                                                                                                                                                                             | Are you able to clean up after a meal? .....                                               | <input type="checkbox"/><br>5                                                                                     | <input type="checkbox"/><br>4   | <input type="checkbox"/><br>3 | <input type="checkbox"/><br>2 | <input type="checkbox"/><br>1 |  |
| PF_12                                                                                                                                                                                             | How much difficulty do you currently have opening previously opened jars? .....            | <input type="checkbox"/><br>5                                                                                     | <input type="checkbox"/><br>4   | <input type="checkbox"/><br>3 | <input type="checkbox"/><br>2 | <input type="checkbox"/><br>1 |  |
| PF_13                                                                                                                                                                                             | Are you able to dial a number on the keypad of a cell phone? .....                         | <input type="checkbox"/><br>5                                                                                     | <input type="checkbox"/><br>4   | <input type="checkbox"/><br>3 | <input type="checkbox"/><br>2 | <input type="checkbox"/><br>1 |  |
| PF_14                                                                                                                                                                                             | Are you able to roll onto your stomach while lying in bed? .....                           | <input type="checkbox"/><br>5                                                                                     | <input type="checkbox"/><br>4   | <input type="checkbox"/><br>3 | <input type="checkbox"/><br>2 | <input type="checkbox"/><br>1 |  |

|       |                                                                                                             | <b>Without<br/>any<br/>difficulty</b> | <b>With a<br/>little<br/>difficulty</b> | <b>With some<br/>difficulty</b> | <b>With<br/>much<br/>difficulty</b> | <b>Unable to<br/>do</b>       |
|-------|-------------------------------------------------------------------------------------------------------------|---------------------------------------|-----------------------------------------|---------------------------------|-------------------------------------|-------------------------------|
| PF_15 | Are you able to pull up covers while lying in bed?.....                                                     | <input type="checkbox"/><br>5         | <input type="checkbox"/><br>4           | <input type="checkbox"/><br>3   | <input type="checkbox"/><br>2       | <input type="checkbox"/><br>1 |
| PF_18 | Are you able to open and squeeze a new tube of toothpaste? .....                                            | <input type="checkbox"/><br>5         | <input type="checkbox"/><br>4           | <input type="checkbox"/><br>3   | <input type="checkbox"/><br>2       | <input type="checkbox"/><br>1 |
| PF_19 | How much difficulty do you currently have pulling up and fastening your pants after a bowel movement? ..... | <input type="checkbox"/><br>5         | <input type="checkbox"/><br>4           | <input type="checkbox"/><br>3   | <input type="checkbox"/><br>2       | <input type="checkbox"/><br>1 |
| PF_2  | Are you able to fasten and unfasten a seatbelt? .....                                                       | <input type="checkbox"/><br>5         | <input type="checkbox"/><br>4           | <input type="checkbox"/><br>3   | <input type="checkbox"/><br>2       | <input type="checkbox"/><br>1 |
| PF_20 | Are you able to do chores such as vacuuming carpet or mopping floors? .....                                 | <input type="checkbox"/><br>5         | <input type="checkbox"/><br>4           | <input type="checkbox"/><br>3   | <input type="checkbox"/><br>2       | <input type="checkbox"/><br>1 |
| PF_22 | Are you able to lift small objects (such as a can of soup) above your shoulder? .....                       | <input type="checkbox"/><br>5         | <input type="checkbox"/><br>4           | <input type="checkbox"/><br>3   | <input type="checkbox"/><br>2       | <input type="checkbox"/><br>1 |
| PF_23 | Are you able to reach and get down an object (such as a can of soup) from above your head? .....            | <input type="checkbox"/><br>5         | <input type="checkbox"/><br>4           | <input type="checkbox"/><br>3   | <input type="checkbox"/><br>2       | <input type="checkbox"/><br>1 |
| PF_24 | Are you able to carry a bag of groceries for a short distance? .....                                        | <input type="checkbox"/><br>5         | <input type="checkbox"/><br>4           | <input type="checkbox"/><br>3   | <input type="checkbox"/><br>2       | <input type="checkbox"/><br>1 |
| PF_25 | Are you able to put on socks? .....                                                                         | <input type="checkbox"/><br>5         | <input type="checkbox"/><br>4           | <input type="checkbox"/><br>3   | <input type="checkbox"/><br>2       | <input type="checkbox"/><br>1 |
| PF_26 | Are you able to pull a sweater or t-shirt over your head? .....                                             | <input type="checkbox"/><br>5         | <input type="checkbox"/><br>4           | <input type="checkbox"/><br>3   | <input type="checkbox"/><br>2       | <input type="checkbox"/><br>1 |
| PF_27 | How much difficulty do you currently have cleaning yourself after a bowel movement? .....                   | <input type="checkbox"/><br>5         | <input type="checkbox"/><br>4           | <input type="checkbox"/><br>3   | <input type="checkbox"/><br>2       | <input type="checkbox"/><br>1 |
| PF_28 | Are you able to do an exercise of your choice for 20 minutes several times a week? .....                    | <input type="checkbox"/><br>5         | <input type="checkbox"/><br>4           | <input type="checkbox"/><br>3   | <input type="checkbox"/><br>2       | <input type="checkbox"/><br>1 |

|       |                                                                                                           | <b>Without<br/>any<br/>difficulty</b> | <b>With a<br/>little<br/>difficulty</b> | <b>With some<br/>difficulty</b> | <b>With<br/>much<br/>difficulty</b> | <b>Unable to<br/>do</b>       |
|-------|-----------------------------------------------------------------------------------------------------------|---------------------------------------|-----------------------------------------|---------------------------------|-------------------------------------|-------------------------------|
| PF_29 | Are you able to do strenuous tasks around the house like cleaning the bathroom or scrubbing floors? ..... | <input type="checkbox"/><br>5         | <input type="checkbox"/><br>4           | <input type="checkbox"/><br>3   | <input type="checkbox"/><br>2       | <input type="checkbox"/><br>1 |
|       |                                                                                                           |                                       |                                         |                                 |                                     |                               |
| PF_30 | Are you able to pour liquid from a container into a cup? .....                                            | <input type="checkbox"/><br>5         | <input type="checkbox"/><br>4           | <input type="checkbox"/><br>3   | <input type="checkbox"/><br>2       | <input type="checkbox"/><br>1 |
|       |                                                                                                           |                                       |                                         |                                 |                                     |                               |
| PF_31 | Are you able to turn pages in a book? .....                                                               | <input type="checkbox"/><br>5         | <input type="checkbox"/><br>4           | <input type="checkbox"/><br>3   | <input type="checkbox"/><br>2       | <input type="checkbox"/><br>1 |
|       |                                                                                                           |                                       |                                         |                                 |                                     |                               |
| PF_32 | Are you able to prepare simple meals for yourself or for others? .....                                    | <input type="checkbox"/><br>5         | <input type="checkbox"/><br>4           | <input type="checkbox"/><br>3   | <input type="checkbox"/><br>2       | <input type="checkbox"/><br>1 |
|       |                                                                                                           |                                       |                                         |                                 |                                     |                               |
| PF_33 | Are you able to reach above your head? ....                                                               | <input type="checkbox"/><br>5         | <input type="checkbox"/><br>4           | <input type="checkbox"/><br>3   | <input type="checkbox"/><br>2       | <input type="checkbox"/><br>1 |
|       |                                                                                                           |                                       |                                         |                                 |                                     |                               |
| PF_34 | Are you able to do housework like vacuuming or sweeping floors? .....                                     | <input type="checkbox"/><br>5         | <input type="checkbox"/><br>4           | <input type="checkbox"/><br>3   | <input type="checkbox"/><br>2       | <input type="checkbox"/><br>1 |
|       |                                                                                                           |                                       |                                         |                                 |                                     |                               |
| PF_35 | Are you able to do yard work like raking leaves or sweeping the driveway? .....                           | <input type="checkbox"/><br>5         | <input type="checkbox"/><br>4           | <input type="checkbox"/><br>3   | <input type="checkbox"/><br>2       | <input type="checkbox"/><br>1 |
|       |                                                                                                           |                                       |                                         |                                 |                                     |                               |
| PF_36 | Are you able to take a letter out of an envelope? .....                                                   | <input type="checkbox"/><br>5         | <input type="checkbox"/><br>4           | <input type="checkbox"/><br>3   | <input type="checkbox"/><br>2       | <input type="checkbox"/><br>1 |
|       |                                                                                                           |                                       |                                         |                                 |                                     |                               |
| PF_37 | Are you able to push the buttons on a television remote control? .....                                    | <input type="checkbox"/><br>5         | <input type="checkbox"/><br>4           | <input type="checkbox"/><br>3   | <input type="checkbox"/><br>2       | <input type="checkbox"/><br>1 |
|       |                                                                                                           |                                       |                                         |                                 |                                     |                               |
| PF_38 | Are you able to get items in and out of a wallet? .....                                                   | <input type="checkbox"/><br>5         | <input type="checkbox"/><br>4           | <input type="checkbox"/><br>3   | <input type="checkbox"/><br>2       | <input type="checkbox"/><br>1 |
|       |                                                                                                           |                                       |                                         |                                 |                                     |                               |
| PF_39 | Are you able to turn a key to unlock a door? .....                                                        | <input type="checkbox"/><br>5         | <input type="checkbox"/><br>4           | <input type="checkbox"/><br>3   | <input type="checkbox"/><br>2       | <input type="checkbox"/><br>1 |
|       |                                                                                                           |                                       |                                         |                                 |                                     |                               |
| PF_4  | Are you able to take a shower? .....                                                                      | <input type="checkbox"/><br>5         | <input type="checkbox"/><br>4           | <input type="checkbox"/><br>3   | <input type="checkbox"/><br>2       | <input type="checkbox"/><br>1 |
|       |                                                                                                           |                                       |                                         |                                 |                                     |                               |
| PF_40 | Are you able to turn sink faucets on and off? .....                                                       | <input type="checkbox"/><br>5         | <input type="checkbox"/><br>4           | <input type="checkbox"/><br>3   | <input type="checkbox"/><br>2       | <input type="checkbox"/><br>1 |

|       |                                                                                   | <b>Without<br/>any<br/>difficulty</b> | <b>With a<br/>little<br/>difficulty</b> | <b>With some<br/>difficulty</b> | <b>With<br/>much<br/>difficulty</b> | <b>Unable to<br/>do</b>       |
|-------|-----------------------------------------------------------------------------------|---------------------------------------|-----------------------------------------|---------------------------------|-------------------------------------|-------------------------------|
| PF_41 | Are you able to type a few sentences on a computer keyboard? .....                | <input type="checkbox"/><br>5         | <input type="checkbox"/><br>4           | <input type="checkbox"/><br>3   | <input type="checkbox"/><br>2       | <input type="checkbox"/><br>1 |
|       |                                                                                   |                                       |                                         |                                 |                                     |                               |
| PF_42 | Are you able to move about the house? .....                                       | <input type="checkbox"/><br>5         | <input type="checkbox"/><br>4           | <input type="checkbox"/><br>3   | <input type="checkbox"/><br>2       | <input type="checkbox"/><br>1 |
|       |                                                                                   |                                       |                                         |                                 |                                     |                               |
| PF_43 | Are you able to use a regular computer mouse? .....                               | <input type="checkbox"/><br>5         | <input type="checkbox"/><br>4           | <input type="checkbox"/><br>3   | <input type="checkbox"/><br>2       | <input type="checkbox"/><br>1 |
|       |                                                                                   |                                       |                                         |                                 |                                     |                               |
| PF_44 | Are you able to move wet clothes from the washer to the dryer? .....              | <input type="checkbox"/><br>5         | <input type="checkbox"/><br>4           | <input type="checkbox"/><br>3   | <input type="checkbox"/><br>2       | <input type="checkbox"/><br>1 |
|       |                                                                                   |                                       |                                         |                                 |                                     |                               |
| PF_45 | Are you able to move around on a slippery surface outdoors? .....                 | <input type="checkbox"/><br>5         | <input type="checkbox"/><br>4           | <input type="checkbox"/><br>3   | <input type="checkbox"/><br>2       | <input type="checkbox"/><br>1 |
|       |                                                                                   |                                       |                                         |                                 |                                     |                               |
| PF_46 | Are you able to move about in a dark room or hallway without falling?.....        | <input type="checkbox"/><br>5         | <input type="checkbox"/><br>4           | <input type="checkbox"/><br>3   | <input type="checkbox"/><br>2       | <input type="checkbox"/><br>1 |
|       |                                                                                   |                                       |                                         |                                 |                                     |                               |
| PF_47 | Are you able to do vigorous activities, such as playing sports? .....             | <input type="checkbox"/><br>5         | <input type="checkbox"/><br>4           | <input type="checkbox"/><br>3   | <input type="checkbox"/><br>2       | <input type="checkbox"/><br>1 |
|       |                                                                                   |                                       |                                         |                                 |                                     |                               |
| PF_48 | Are you able to carry a shopping bag? .....                                       | <input type="checkbox"/><br>5         | <input type="checkbox"/><br>4           | <input type="checkbox"/><br>3   | <input type="checkbox"/><br>2       | <input type="checkbox"/><br>1 |
|       |                                                                                   |                                       |                                         |                                 |                                     |                               |
| PF_49 | Are you able to dress yourself?.....                                              | <input type="checkbox"/><br>5         | <input type="checkbox"/><br>4           | <input type="checkbox"/><br>3   | <input type="checkbox"/><br>2       | <input type="checkbox"/><br>1 |
|       |                                                                                   |                                       |                                         |                                 |                                     |                               |
| PF_5  | Are you able to wash and dry your feet? ...                                       | <input type="checkbox"/><br>5         | <input type="checkbox"/><br>4           | <input type="checkbox"/><br>3   | <input type="checkbox"/><br>2       | <input type="checkbox"/><br>1 |
|       |                                                                                   |                                       |                                         |                                 |                                     |                               |
| PF_50 | Are you able to wash dishes and utensils by hand? .....                           | <input type="checkbox"/><br>5         | <input type="checkbox"/><br>4           | <input type="checkbox"/><br>3   | <input type="checkbox"/><br>2       | <input type="checkbox"/><br>1 |
|       |                                                                                   |                                       |                                         |                                 |                                     |                               |
| PF_51 | How much difficulty do you currently have sitting down on a low, soft couch? .... | <input type="checkbox"/><br>5         | <input type="checkbox"/><br>4           | <input type="checkbox"/><br>3   | <input type="checkbox"/><br>2       | <input type="checkbox"/><br>1 |
|       |                                                                                   |                                       |                                         |                                 |                                     |                               |
| PF_54 | Are you able to transfer from a bed to a chair or a wheelchair? .....             | <input type="checkbox"/><br>5         | <input type="checkbox"/><br>4           | <input type="checkbox"/><br>3   | <input type="checkbox"/><br>2       | <input type="checkbox"/><br>1 |



|       |                                                                                                                            | <b>Without<br/>any<br/>difficulty</b> | <b>With a<br/>little<br/>difficulty</b> | <b>With some<br/>difficulty</b> | <b>With<br/>much<br/>difficulty</b> | <b>Unable to<br/>do</b>       |
|-------|----------------------------------------------------------------------------------------------------------------------------|---------------------------------------|-----------------------------------------|---------------------------------|-------------------------------------|-------------------------------|
| PF_55 | If you need to, are you physically able to rush for a short distance, such as to cross a street? .....                     | <input type="checkbox"/><br>5         | <input type="checkbox"/><br>4           | <input type="checkbox"/><br>3   | <input type="checkbox"/><br>2       | <input type="checkbox"/><br>1 |
| PF_56 | Are you able to move from the street to the sidewalk without a curb cut?.....                                              | <input type="checkbox"/><br>5         | <input type="checkbox"/><br>4           | <input type="checkbox"/><br>3   | <input type="checkbox"/><br>2       | <input type="checkbox"/><br>1 |
| PF_57 | Are you able to use a moving escalator safely? .....                                                                       | <input type="checkbox"/><br>5         | <input type="checkbox"/><br>4           | <input type="checkbox"/><br>3   | <input type="checkbox"/><br>2       | <input type="checkbox"/><br>1 |
| PF_58 | Are you able to fasten buttons on a shirt or blouse? .....                                                                 | <input type="checkbox"/><br>5         | <input type="checkbox"/><br>4           | <input type="checkbox"/><br>3   | <input type="checkbox"/><br>2       | <input type="checkbox"/><br>1 |
| PF_59 | Are you able to hold a card or letter in order to read it? .....                                                           | <input type="checkbox"/><br>5         | <input type="checkbox"/><br>4           | <input type="checkbox"/><br>3   | <input type="checkbox"/><br>2       | <input type="checkbox"/><br>1 |
| PF_6  | Are you able to cut your toenails? .....                                                                                   | <input type="checkbox"/><br>5         | <input type="checkbox"/><br>4           | <input type="checkbox"/><br>3   | <input type="checkbox"/><br>2       | <input type="checkbox"/><br>1 |
| PF_60 | Are you able to fold clean laundry?.....                                                                                   | <input type="checkbox"/><br>5         | <input type="checkbox"/><br>4           | <input type="checkbox"/><br>3   | <input type="checkbox"/><br>2       | <input type="checkbox"/><br>1 |
| PF_61 | Are you able to get into a vehicle? .....                                                                                  | <input type="checkbox"/><br>5         | <input type="checkbox"/><br>4           | <input type="checkbox"/><br>3   | <input type="checkbox"/><br>2       | <input type="checkbox"/><br>1 |
| PF_62 | How much difficulty do you currently have getting into and out of a truck, bus, shuttle van or sport utility vehicle?..... | <input type="checkbox"/><br>5         | <input type="checkbox"/><br>4           | <input type="checkbox"/><br>3   | <input type="checkbox"/><br>2       | <input type="checkbox"/><br>1 |
| PF_63 | How much difficulty do you currently have applying spreads to breads using a knife? .....                                  | <input type="checkbox"/><br>5         | <input type="checkbox"/><br>4           | <input type="checkbox"/><br>3   | <input type="checkbox"/><br>2       | <input type="checkbox"/><br>1 |
| PF_64 | How much difficulty do you currently have playing cards or Bingo or other light recreational activities? .....             | <input type="checkbox"/><br>5         | <input type="checkbox"/><br>4           | <input type="checkbox"/><br>3   | <input type="checkbox"/><br>2       | <input type="checkbox"/><br>1 |

|       |                                                                                          | <b>Without<br/>any<br/>difficulty</b> | <b>With a<br/>little<br/>difficulty</b> | <b>With some<br/>difficulty</b> | <b>With<br/>much<br/>difficulty</b> | <b>Unable to<br/>do</b>       |
|-------|------------------------------------------------------------------------------------------|---------------------------------------|-----------------------------------------|---------------------------------|-------------------------------------|-------------------------------|
| PF_65 | How much difficulty do you currently have removing wrappings from small objects? .....   | <input type="checkbox"/><br>5         | <input type="checkbox"/><br>4           | <input type="checkbox"/><br>3   | <input type="checkbox"/><br>2       | <input type="checkbox"/><br>1 |
|       |                                                                                          |                                       |                                         |                                 |                                     |                               |
| PF_7  | Are you able to exercise regularly? .....                                                | <input type="checkbox"/><br>5         | <input type="checkbox"/><br>4           | <input type="checkbox"/><br>3   | <input type="checkbox"/><br>2       | <input type="checkbox"/><br>1 |
|       |                                                                                          |                                       |                                         |                                 |                                     |                               |
| PF_9  | Are you able to receive a call on a cell phone? .....                                    | <input type="checkbox"/><br>5         | <input type="checkbox"/><br>4           | <input type="checkbox"/><br>3   | <input type="checkbox"/><br>2       | <input type="checkbox"/><br>1 |
|       |                                                                                          |                                       |                                         |                                 |                                     |                               |
| PFA12 | Are you able to push open a heavy door? ..                                               | <input type="checkbox"/><br>5         | <input type="checkbox"/><br>4           | <input type="checkbox"/><br>3   | <input type="checkbox"/><br>2       | <input type="checkbox"/><br>1 |
|       |                                                                                          |                                       |                                         |                                 |                                     |                               |
| PFA14 | Are you able to carry a heavy object (over 10 pounds)? .....                             | <input type="checkbox"/><br>5         | <input type="checkbox"/><br>4           | <input type="checkbox"/><br>3   | <input type="checkbox"/><br>2       | <input type="checkbox"/><br>1 |
|       |                                                                                          |                                       |                                         |                                 |                                     |                               |
| PFA20 | Are you able to cut your food using eating utensils? .....                               | <input type="checkbox"/><br>5         | <input type="checkbox"/><br>4           | <input type="checkbox"/><br>3   | <input type="checkbox"/><br>2       | <input type="checkbox"/><br>1 |
|       |                                                                                          |                                       |                                         |                                 |                                     |                               |
| PFA25 | Are you able to do yard work like raking leaves, weeding, or pushing a lawn mower? ..... | <input type="checkbox"/><br>5         | <input type="checkbox"/><br>4           | <input type="checkbox"/><br>3   | <input type="checkbox"/><br>2       | <input type="checkbox"/><br>1 |
|       |                                                                                          |                                       |                                         |                                 |                                     |                               |
| PFA31 | Are you able to get up off the floor from lying on your back without help? .....         | <input type="checkbox"/><br>5         | <input type="checkbox"/><br>4           | <input type="checkbox"/><br>3   | <input type="checkbox"/><br>2       | <input type="checkbox"/><br>1 |
|       |                                                                                          |                                       |                                         |                                 |                                     |                               |
| PFA33 | Are you able to exercise hard for half an hour? .....                                    | <input type="checkbox"/><br>5         | <input type="checkbox"/><br>4           | <input type="checkbox"/><br>3   | <input type="checkbox"/><br>2       | <input type="checkbox"/><br>1 |
|       |                                                                                          |                                       |                                         |                                 |                                     |                               |
| PFA36 | Are you able to put on and take off a coat or jacket? .....                              | <input type="checkbox"/><br>5         | <input type="checkbox"/><br>4           | <input type="checkbox"/><br>3   | <input type="checkbox"/><br>2       | <input type="checkbox"/><br>1 |
|       |                                                                                          |                                       |                                         |                                 |                                     |                               |
| PFA38 | Are you able to dry your back with a towel? .....                                        | <input type="checkbox"/><br>5         | <input type="checkbox"/><br>4           | <input type="checkbox"/><br>3   | <input type="checkbox"/><br>2       | <input type="checkbox"/><br>1 |
|       |                                                                                          |                                       |                                         |                                 |                                     |                               |
| PFA43 | Are you able to write with a pen or pencil? .....                                        | <input type="checkbox"/><br>5         | <input type="checkbox"/><br>4           | <input type="checkbox"/><br>3   | <input type="checkbox"/><br>2       | <input type="checkbox"/><br>1 |
|       |                                                                                          |                                       |                                         |                                 |                                     |                               |
| PFA44 | Are you able to put on a shirt or blouse? ...                                            | <input type="checkbox"/><br>5         | <input type="checkbox"/><br>4           | <input type="checkbox"/><br>3   | <input type="checkbox"/><br>2       | <input type="checkbox"/><br>1 |

|       |                                                                                 | Without<br>any<br>difficulty  | With a<br>little<br>difficulty | With some<br>difficulty       | With<br>much<br>difficulty    | Unable to<br>do               |
|-------|---------------------------------------------------------------------------------|-------------------------------|--------------------------------|-------------------------------|-------------------------------|-------------------------------|
| PFA45 | Are you able to get out of bed into a chair? .....                              | <input type="checkbox"/><br>5 | <input type="checkbox"/><br>4  | <input type="checkbox"/><br>3 | <input type="checkbox"/><br>2 | <input type="checkbox"/><br>1 |
|       |                                                                                 |                               |                                |                               |                               |                               |
| PFA50 | Are you able to brush your teeth? .....                                         | <input type="checkbox"/><br>5 | <input type="checkbox"/><br>4  | <input type="checkbox"/><br>3 | <input type="checkbox"/><br>2 | <input type="checkbox"/><br>1 |
|       |                                                                                 |                               |                                |                               |                               |                               |
| PFA51 | Are you able to sit on the edge of a bed?...                                    | <input type="checkbox"/><br>5 | <input type="checkbox"/><br>4  | <input type="checkbox"/><br>3 | <input type="checkbox"/><br>2 | <input type="checkbox"/><br>1 |
|       |                                                                                 |                               |                                |                               |                               |                               |
| PFA52 | Are you able to tie your shoelaces? .....                                       | <input type="checkbox"/><br>5 | <input type="checkbox"/><br>4  | <input type="checkbox"/><br>3 | <input type="checkbox"/><br>2 | <input type="checkbox"/><br>1 |
|       |                                                                                 |                               |                                |                               |                               |                               |
| PFA53 | Are you able to run errands and shop? .....                                     | <input type="checkbox"/><br>5 | <input type="checkbox"/><br>4  | <input type="checkbox"/><br>3 | <input type="checkbox"/><br>2 | <input type="checkbox"/><br>1 |
|       |                                                                                 |                               |                                |                               |                               |                               |
| PFA55 | Are you able to wash and dry your body? .                                       | <input type="checkbox"/><br>5 | <input type="checkbox"/><br>4  | <input type="checkbox"/><br>3 | <input type="checkbox"/><br>2 | <input type="checkbox"/><br>1 |
|       |                                                                                 |                               |                                |                               |                               |                               |
| PFA56 | Are you able to get in and out of a car? .....                                  | <input type="checkbox"/><br>5 | <input type="checkbox"/><br>4  | <input type="checkbox"/><br>3 | <input type="checkbox"/><br>2 | <input type="checkbox"/><br>1 |
|       |                                                                                 |                               |                                |                               |                               |                               |
| PFA8  | Are you able to move a chair from one room to another? .....                    | <input type="checkbox"/><br>5 | <input type="checkbox"/><br>4  | <input type="checkbox"/><br>3 | <input type="checkbox"/><br>2 | <input type="checkbox"/><br>1 |
|       |                                                                                 |                               |                                |                               |                               |                               |
| PFA9  | Are you able to bend down and pick up clothing from the floor? .....            | <input type="checkbox"/><br>5 | <input type="checkbox"/><br>4  | <input type="checkbox"/><br>3 | <input type="checkbox"/><br>2 | <input type="checkbox"/><br>1 |
|       |                                                                                 |                               |                                |                               |                               |                               |
| PFB12 | Are you able to make a bed, including spreading and tucking in bed sheets?..... | <input type="checkbox"/><br>5 | <input type="checkbox"/><br>4  | <input type="checkbox"/><br>3 | <input type="checkbox"/><br>2 | <input type="checkbox"/><br>1 |
|       |                                                                                 |                               |                                |                               |                               |                               |
| PFB15 | Are you able to change the bulb in a table lamp? .....                          | <input type="checkbox"/><br>5 | <input type="checkbox"/><br>4  | <input type="checkbox"/><br>3 | <input type="checkbox"/><br>2 | <input type="checkbox"/><br>1 |
|       |                                                                                 |                               |                                |                               |                               |                               |
| PFB20 | Are you able to cut a piece of paper with scissors? .....                       | <input type="checkbox"/><br>5 | <input type="checkbox"/><br>4  | <input type="checkbox"/><br>3 | <input type="checkbox"/><br>2 | <input type="checkbox"/><br>1 |
|       |                                                                                 |                               |                                |                               |                               |                               |
| PFB21 | Are you able to pick up coins from a table top? .....                           | <input type="checkbox"/><br>5 | <input type="checkbox"/><br>4  | <input type="checkbox"/><br>3 | <input type="checkbox"/><br>2 | <input type="checkbox"/><br>1 |
|       |                                                                                 |                               |                                |                               |                               |                               |
| PFB22 | Are you able to hold a plate full of food? ..                                   | <input type="checkbox"/><br>5 | <input type="checkbox"/><br>4  | <input type="checkbox"/><br>3 | <input type="checkbox"/><br>2 | <input type="checkbox"/><br>1 |

|          |                                                                                   | Without<br>any<br>difficulty          | With a<br>little<br>difficulty          | With some<br>difficulty         | With<br>much<br>difficulty          | Unable to<br>do               |
|----------|-----------------------------------------------------------------------------------|---------------------------------------|-----------------------------------------|---------------------------------|-------------------------------------|-------------------------------|
| PFB26    | Are you able to shampoo your hair? .....                                          | <input type="checkbox"/><br>5         | <input type="checkbox"/><br>4           | <input type="checkbox"/><br>3   | <input type="checkbox"/><br>2       | <input type="checkbox"/><br>1 |
| PFB27    | Are you able to tie a knot or a bow? .....                                        | <input type="checkbox"/><br>5         | <input type="checkbox"/><br>4           | <input type="checkbox"/><br>3   | <input type="checkbox"/><br>2       | <input type="checkbox"/><br>1 |
| PFB34    | Are you able to change a light bulb overhead? .....                               | <input type="checkbox"/><br>5         | <input type="checkbox"/><br>4           | <input type="checkbox"/><br>3   | <input type="checkbox"/><br>2       | <input type="checkbox"/><br>1 |
| PFB41    | Are you able to trim your fingernails? .....                                      | <input type="checkbox"/><br>5         | <input type="checkbox"/><br>4           | <input type="checkbox"/><br>3   | <input type="checkbox"/><br>2       | <input type="checkbox"/><br>1 |
| PFB8     | Are you able to carry two bags filled with groceries 100 yards? .....             | <input type="checkbox"/><br>5         | <input type="checkbox"/><br>4           | <input type="checkbox"/><br>3   | <input type="checkbox"/><br>2       | <input type="checkbox"/><br>1 |
| PFC42_PF | Are you able to open a tight or new jar? ....                                     | <input type="checkbox"/><br>5         | <input type="checkbox"/><br>4           | <input type="checkbox"/><br>3   | <input type="checkbox"/><br>2       | <input type="checkbox"/><br>1 |
| PFC45    | Are you able to get on and off the toilet? ..                                     | <input type="checkbox"/><br>5         | <input type="checkbox"/><br>4           | <input type="checkbox"/><br>3   | <input type="checkbox"/><br>2       | <input type="checkbox"/><br>1 |
| PFC47    | Are you able to be out of bed most of the day? .....                              | <input type="checkbox"/><br>5         | <input type="checkbox"/><br>4           | <input type="checkbox"/><br>3   | <input type="checkbox"/><br>2       | <input type="checkbox"/><br>1 |
| PFC49    | Are you able to water a house plant? .....                                        | <input type="checkbox"/><br>5         | <input type="checkbox"/><br>4           | <input type="checkbox"/><br>3   | <input type="checkbox"/><br>2       | <input type="checkbox"/><br>1 |
| PFC53    | Are you able to get in and out of bed? .....                                      | <input type="checkbox"/><br>5         | <input type="checkbox"/><br>4           | <input type="checkbox"/><br>3   | <input type="checkbox"/><br>2       | <input type="checkbox"/><br>1 |
|          | <b>Group B Items (PF_16 thru PFC6)</b>                                            | <b>Without<br/>any<br/>difficulty</b> | <b>With a<br/>little<br/>difficulty</b> | <b>With some<br/>difficulty</b> | <b>With<br/>much<br/>difficulty</b> | <b>Unable to<br/>do</b>       |
| PF_16    | Are you able to hike a couple of miles on uneven surfaces, including hills? ..... | <input type="checkbox"/><br>5         | <input type="checkbox"/><br>4           | <input type="checkbox"/><br>3   | <input type="checkbox"/><br>2       | <input type="checkbox"/><br>1 |
| PF_17    | Are you able to walk more than a mile? ....                                       | <input type="checkbox"/><br>5         | <input type="checkbox"/><br>4           | <input type="checkbox"/><br>3   | <input type="checkbox"/><br>2       | <input type="checkbox"/><br>1 |
| PFA23    | Are you able to go for a walk of at least 15 minutes? .....                       | <input type="checkbox"/><br>5         | <input type="checkbox"/><br>4           | <input type="checkbox"/><br>3   | <input type="checkbox"/><br>2       | <input type="checkbox"/><br>1 |

|       | <b>Group B Items (PF_16 thru PFC6)</b>                                          | <b>Without<br/>any<br/>difficulty</b> | <b>With a<br/>little<br/>difficulty</b> | <b>With some<br/>difficulty</b> | <b>With<br/>much<br/>difficulty</b> | <b>Unable to<br/>do</b>       |
|-------|---------------------------------------------------------------------------------|---------------------------------------|-----------------------------------------|---------------------------------|-------------------------------------|-------------------------------|
| PFA42 | Are you able to carry a laundry basket up a flight of stairs? .....             | <input type="checkbox"/><br>5         | <input type="checkbox"/><br>4           | <input type="checkbox"/><br>3   | <input type="checkbox"/><br>2       | <input type="checkbox"/><br>1 |
|       |                                                                                 |                                       |                                         |                                 |                                     |                               |
| PFB9  | Are you able to jump up and down? .....                                         | <input type="checkbox"/><br>5         | <input type="checkbox"/><br>4           | <input type="checkbox"/><br>3   | <input type="checkbox"/><br>2       | <input type="checkbox"/><br>1 |
|       |                                                                                 |                                       |                                         |                                 |                                     |                               |
| PFC13 | Are you able to run 100 yards? .....                                            | <input type="checkbox"/><br>5         | <input type="checkbox"/><br>4           | <input type="checkbox"/><br>3   | <input type="checkbox"/><br>2       | <input type="checkbox"/><br>1 |
|       |                                                                                 |                                       |                                         |                                 |                                     |                               |
| PFC32 | Are you able to climb up 5 flights of stairs? .....                             | <input type="checkbox"/><br>5         | <input type="checkbox"/><br>4           | <input type="checkbox"/><br>3   | <input type="checkbox"/><br>2       | <input type="checkbox"/><br>1 |
|       |                                                                                 |                                       |                                         |                                 |                                     |                               |
| PFC38 | Are you able to walk at a normal speed? ...                                     | <input type="checkbox"/><br>5         | <input type="checkbox"/><br>4           | <input type="checkbox"/><br>3   | <input type="checkbox"/><br>2       | <input type="checkbox"/><br>1 |
|       |                                                                                 |                                       |                                         |                                 |                                     |                               |
| PFC6  | Are you able to walk a block on flat ground? .....                              | <input type="checkbox"/><br>5         | <input type="checkbox"/><br>4           | <input type="checkbox"/><br>3   | <input type="checkbox"/><br>2       | <input type="checkbox"/><br>1 |
|       | <b>Group C Items (PF_21 thru PFC40)</b>                                         | <b>Without<br/>any<br/>difficulty</b> | <b>With a<br/>little<br/>difficulty</b> | <b>With some<br/>difficulty</b> | <b>With<br/>much<br/>difficulty</b> | <b>Unable to<br/>do</b>       |
| PF_21 | Are you able to go up and down stairs? .....                                    | <input type="checkbox"/><br>5         | <input type="checkbox"/><br>4           | <input type="checkbox"/><br>3   | <input type="checkbox"/><br>2       | <input type="checkbox"/><br>1 |
|       |                                                                                 |                                       |                                         |                                 |                                     |                               |
| PF_3  | Are you able to stand on a moving escalator? .....                              | <input type="checkbox"/><br>5         | <input type="checkbox"/><br>4           | <input type="checkbox"/><br>3   | <input type="checkbox"/><br>2       | <input type="checkbox"/><br>1 |
|       |                                                                                 |                                       |                                         |                                 |                                     |                               |
| PF_52 | How much difficulty do you currently have standing up from a low, soft couch? . | <input type="checkbox"/><br>5         | <input type="checkbox"/><br>4           | <input type="checkbox"/><br>3   | <input type="checkbox"/><br>2       | <input type="checkbox"/><br>1 |
|       |                                                                                 |                                       |                                         |                                 |                                     |                               |
| PF_53 | Are you able to stand upright briefly without support? .....                    | <input type="checkbox"/><br>5         | <input type="checkbox"/><br>4           | <input type="checkbox"/><br>3   | <input type="checkbox"/><br>2       | <input type="checkbox"/><br>1 |
|       |                                                                                 |                                       |                                         |                                 |                                     |                               |
| PFA10 | Are you able to stand for one hour? .....                                       | <input type="checkbox"/><br>5         | <input type="checkbox"/><br>4           | <input type="checkbox"/><br>3   | <input type="checkbox"/><br>2       | <input type="checkbox"/><br>1 |
|       |                                                                                 |                                       |                                         |                                 |                                     |                               |
| PFA37 | Are you able to stand for short periods of time? .....                          | <input type="checkbox"/><br>5         | <input type="checkbox"/><br>4           | <input type="checkbox"/><br>3   | <input type="checkbox"/><br>2       | <input type="checkbox"/><br>1 |
|       |                                                                                 |                                       |                                         |                                 |                                     |                               |
| PFA41 | Are you able to squat and get up? .....                                         | <input type="checkbox"/><br>5         | <input type="checkbox"/><br>4           | <input type="checkbox"/><br>3   | <input type="checkbox"/><br>2       | <input type="checkbox"/><br>1 |

|       | <b>Group C Items (PF_21 thru PFC40)</b>                 | <b>Without<br/>any<br/>difficulty</b> | <b>With a<br/>little<br/>difficulty</b> | <b>With some<br/>difficulty</b> | <b>With<br/>much<br/>difficulty</b> | <b>Unable to<br/>do</b>       |
|-------|---------------------------------------------------------|---------------------------------------|-----------------------------------------|---------------------------------|-------------------------------------|-------------------------------|
| PFB10 | Are you able to climb up five steps?.....               | <input type="checkbox"/><br>5         | <input type="checkbox"/><br>4           | <input type="checkbox"/><br>3   | <input type="checkbox"/><br>2       | <input type="checkbox"/><br>1 |
|       |                                                         |                                       |                                         |                                 |                                     |                               |
| PFB32 | Are you able to stand unsupported for 10 minutes? ..... | <input type="checkbox"/><br>5         | <input type="checkbox"/><br>4           | <input type="checkbox"/><br>3   | <input type="checkbox"/><br>2       | <input type="checkbox"/><br>1 |
|       |                                                         |                                       |                                         |                                 |                                     |                               |
| PFC29 | Are you able to walk up and down two steps? .....       | <input type="checkbox"/><br>5         | <input type="checkbox"/><br>4           | <input type="checkbox"/><br>3   | <input type="checkbox"/><br>2       | <input type="checkbox"/><br>1 |
|       |                                                         |                                       |                                         |                                 |                                     |                               |
| PFC40 | Are you able to kneel on the floor?.....                | <input type="checkbox"/><br>5         | <input type="checkbox"/><br>4           | <input type="checkbox"/><br>3   | <input type="checkbox"/><br>2       | <input type="checkbox"/><br>1 |
